# Supplementary material for: Synthesis and evaluation of antineurotoxicity properties of an amyloid-β peptide targeting ligand containing a triamino acid
Source: Royal Society of Chemistry journal article supplement (doi:10.1039/c4ob00959b), 2014-01-01
Supplement: c4ob00959b1.pdf [file c4ob00959b1.pdf]

## Supplementary Information

### Synthesis and Evaluation of Antineurotoxicity Properties of an Amyloid- $\beta$ Peptide Targeting Ligand Containing the Triamino Acid, *N*<sup>γ</sup>-(2-Aminoethyl)-2,4-diaminobutanoate

Dmytro Honcharenko<sup>a,\*</sup>, Partha Pratim Bose<sup>a</sup>, Jyotirmoy Maity<sup>a</sup>, Firoz Roshan Kurudenkandy<sup>b</sup>, Alok Juneja<sup>a</sup>, Erik Flöistrup<sup>a</sup>, Henrik Biverstål<sup>b</sup>, Jan Johansson<sup>b</sup>, Lennart Nilsson<sup>a</sup>, André Fisahn<sup>b</sup> and Roger Strömberg<sup>a,\*</sup>

<sup>a</sup> Department of Biosciences and Nutrition, Karolinska Institutet, S-14183 Huddinge, Sweden

<sup>b</sup> KI-Alzheimer Disease Research Center, Department of Neurobiology, Care Sciences and Society, Karolinska Institute, Stockholm, Sweden

#### Table of Contents

|                                                                                                        |         |
|--------------------------------------------------------------------------------------------------------|---------|
| <b>Figures S1-S6:</b> <sup>1</sup> H NMR spectra of compounds <b>3-6</b> , <b>11</b> , <b>12</b> ..... | S2-S7   |
| <b>Figures S7-S10:</b> <sup>13</sup> C APT NMR spectra of compounds <b>3-6</b> .....                   | S8-S11  |
| <b>Figures S11-S12:</b> ESI-TOF MS spectra of compounds <b>11</b> and <b>12</b> .....                  | S12-S13 |
| <b>Figures S13-S14:</b> HPLC chromatograms of crude compounds <b>11</b> and <b>12</b> .....            | S14-S15 |
| <b>Figures S15-S16:</b> COSY spectrum of compound <b>11</b> .....                                      | S16-S17 |
| <b>Figures S17-S18:</b> COSY spectrum of compound <b>12</b> .....                                      | S18-S19 |

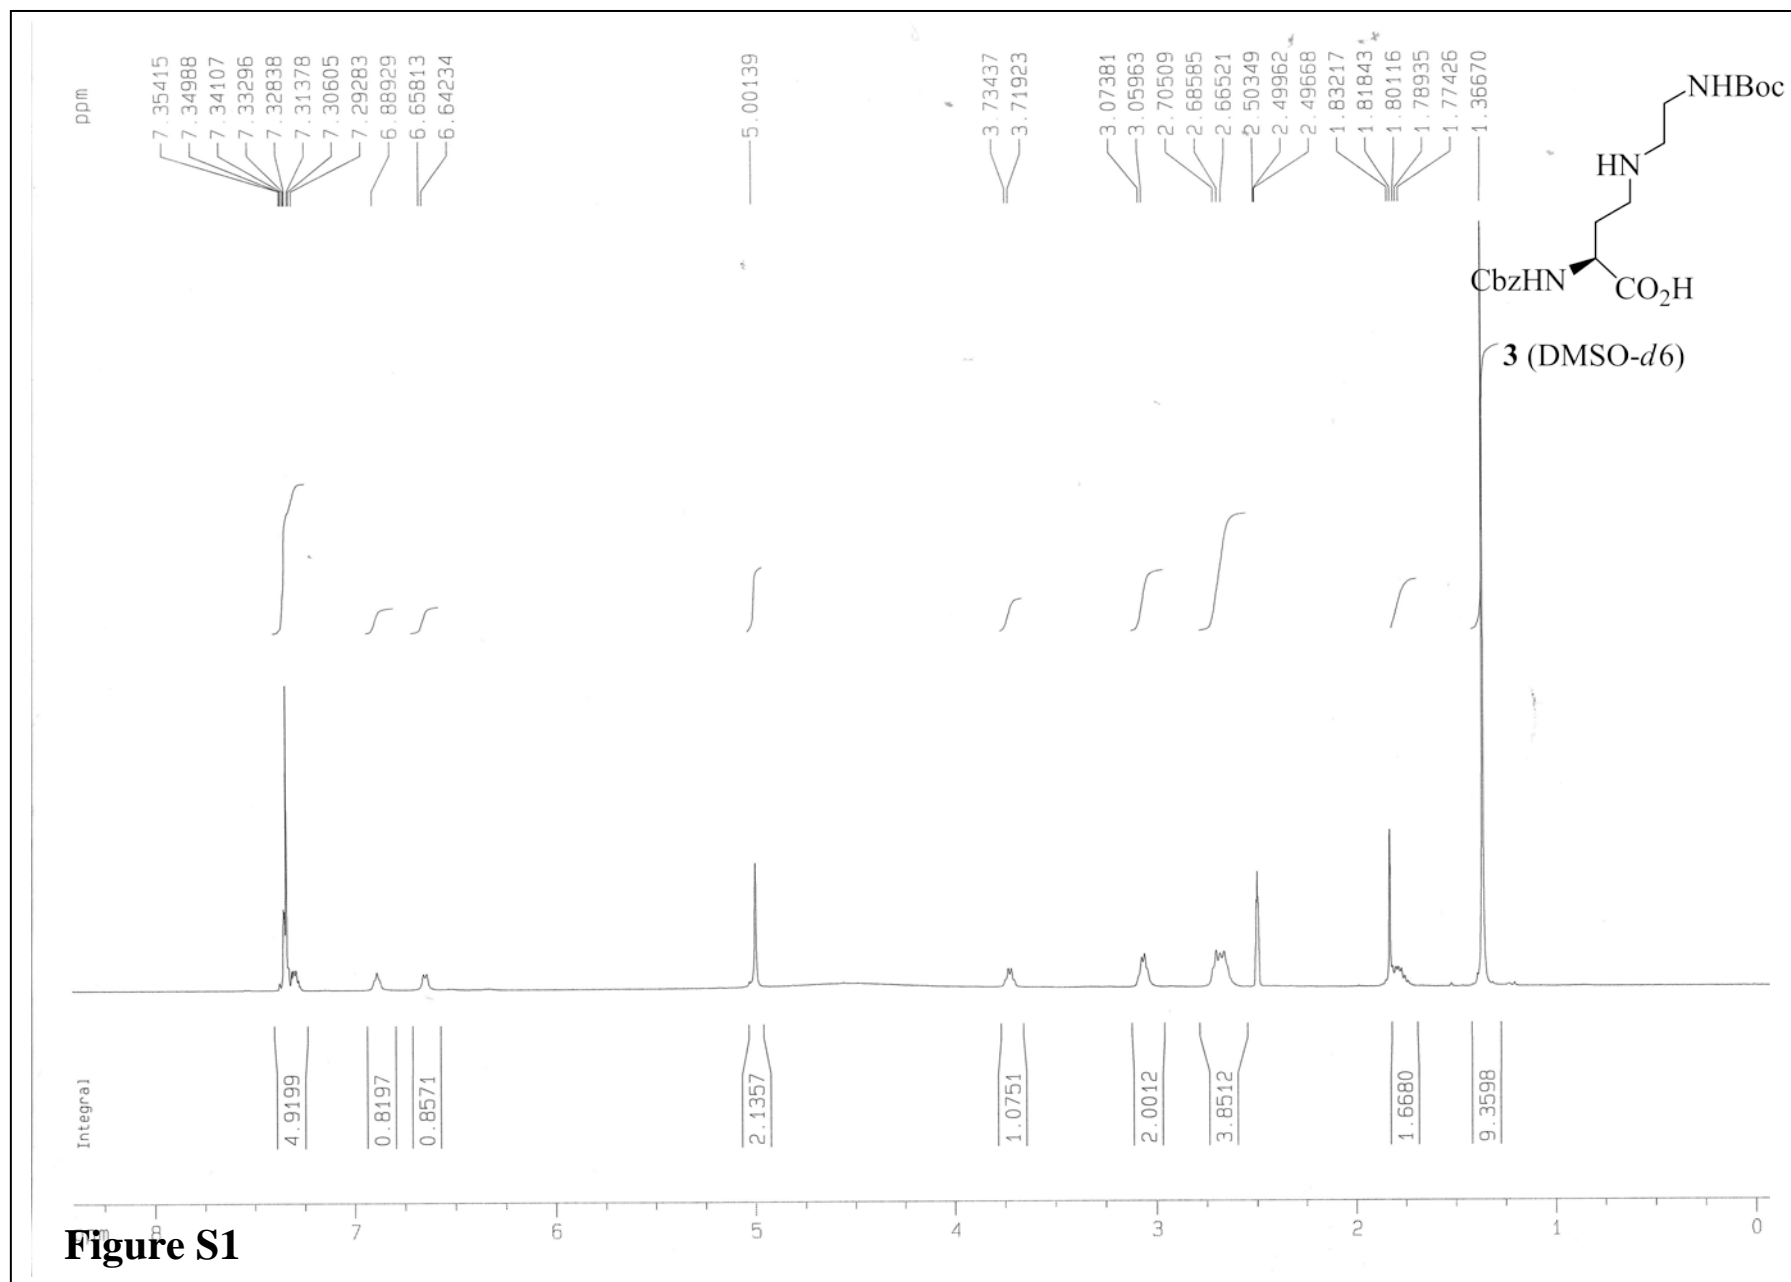

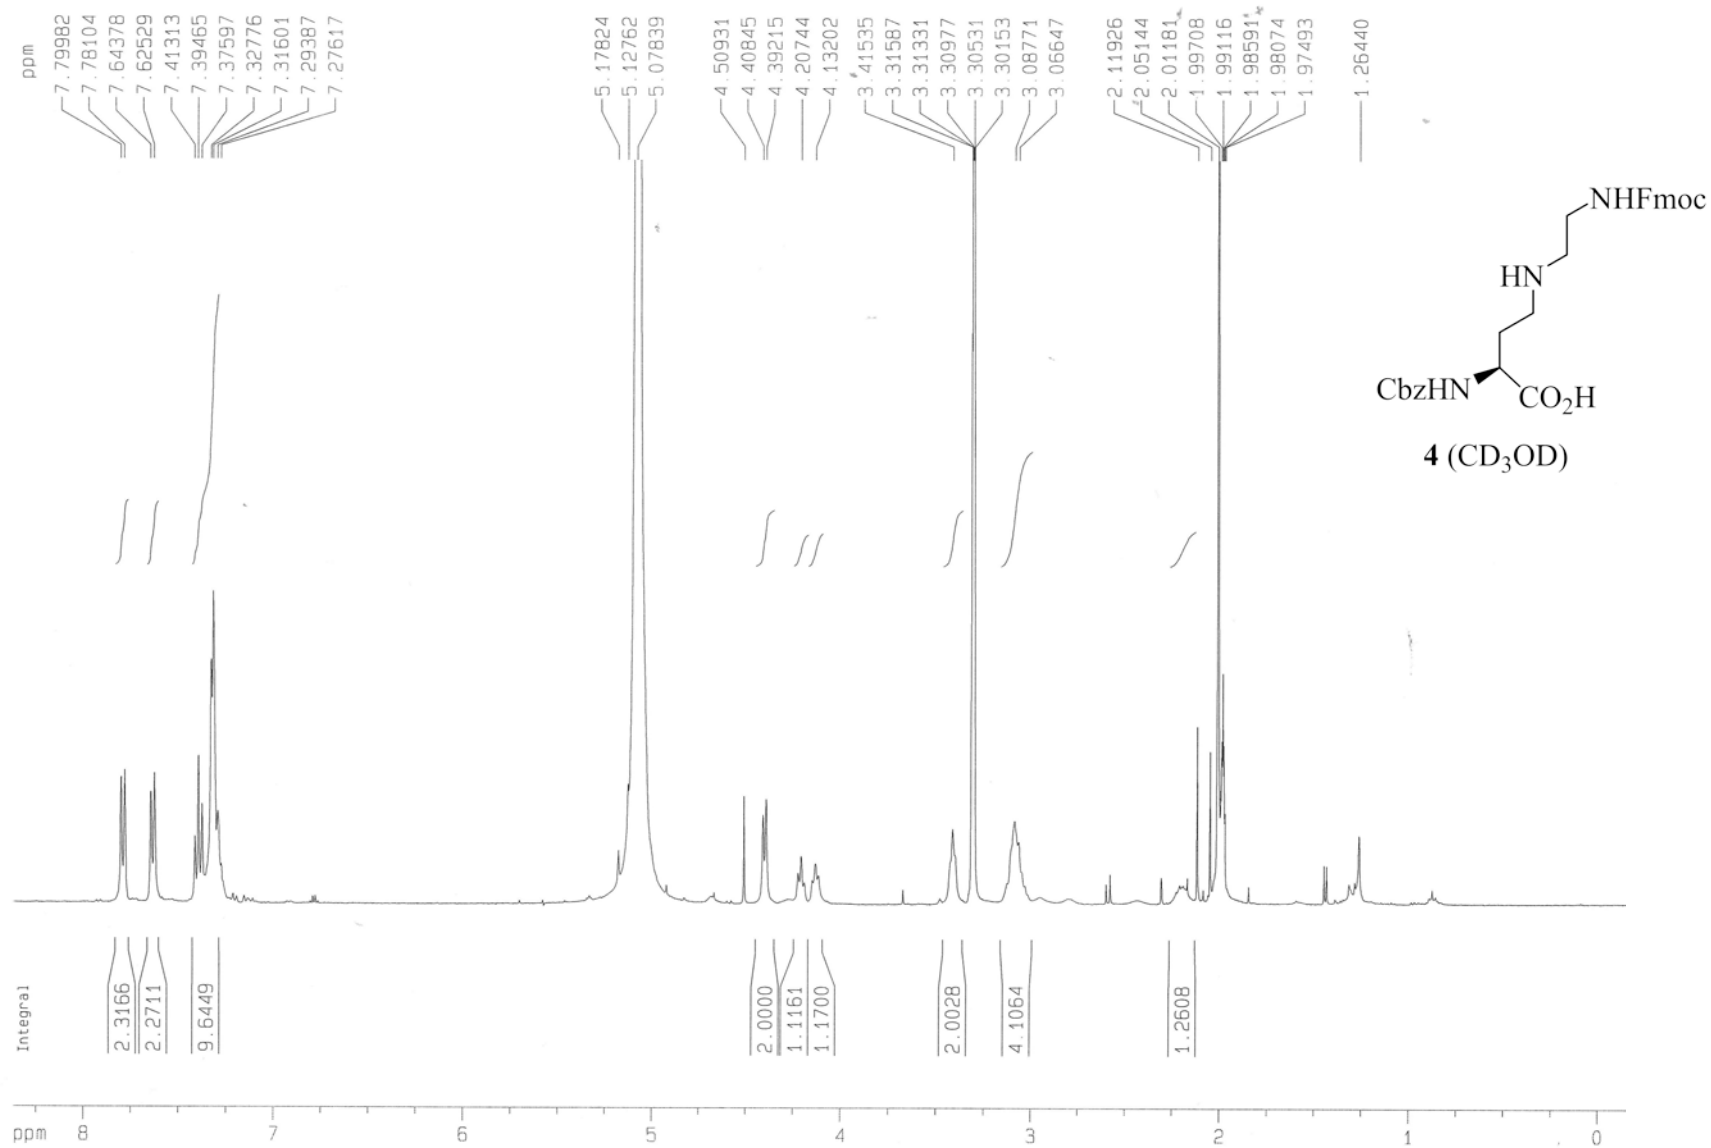

**Figure S2**

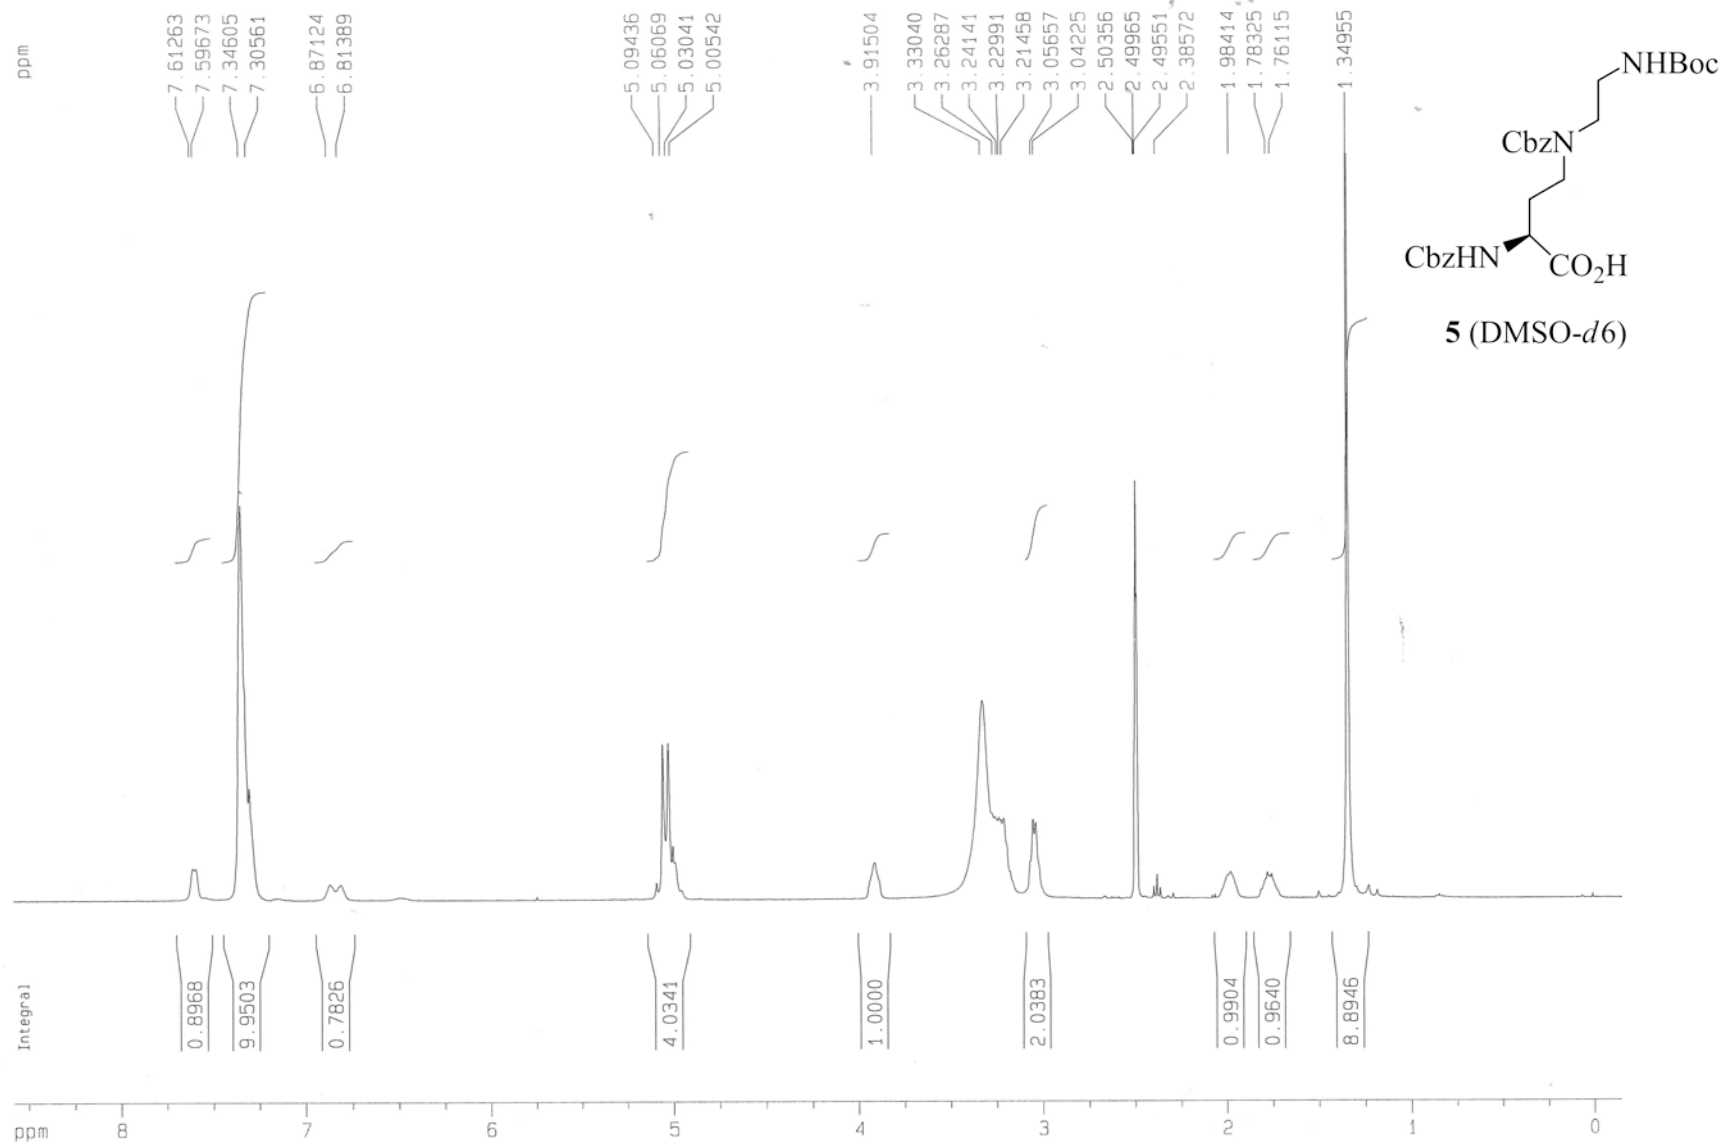

**Figure S3**

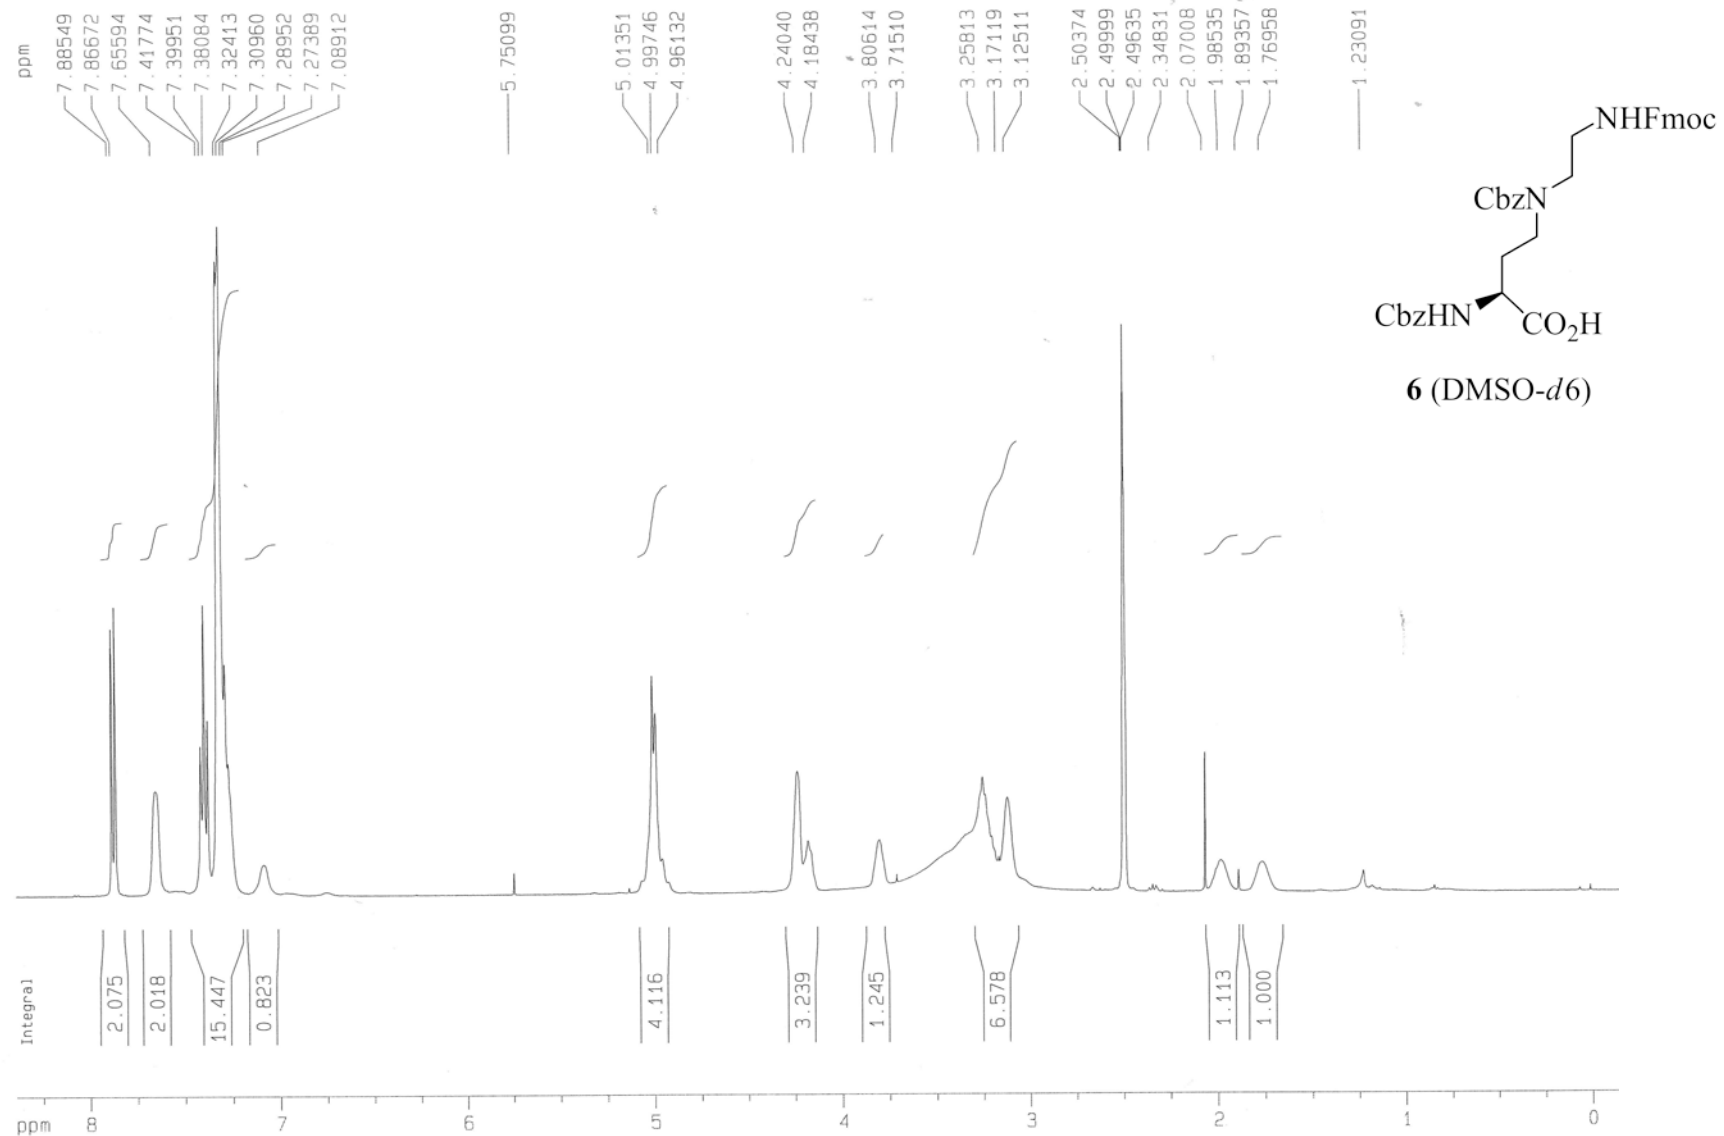

**Figure S4**

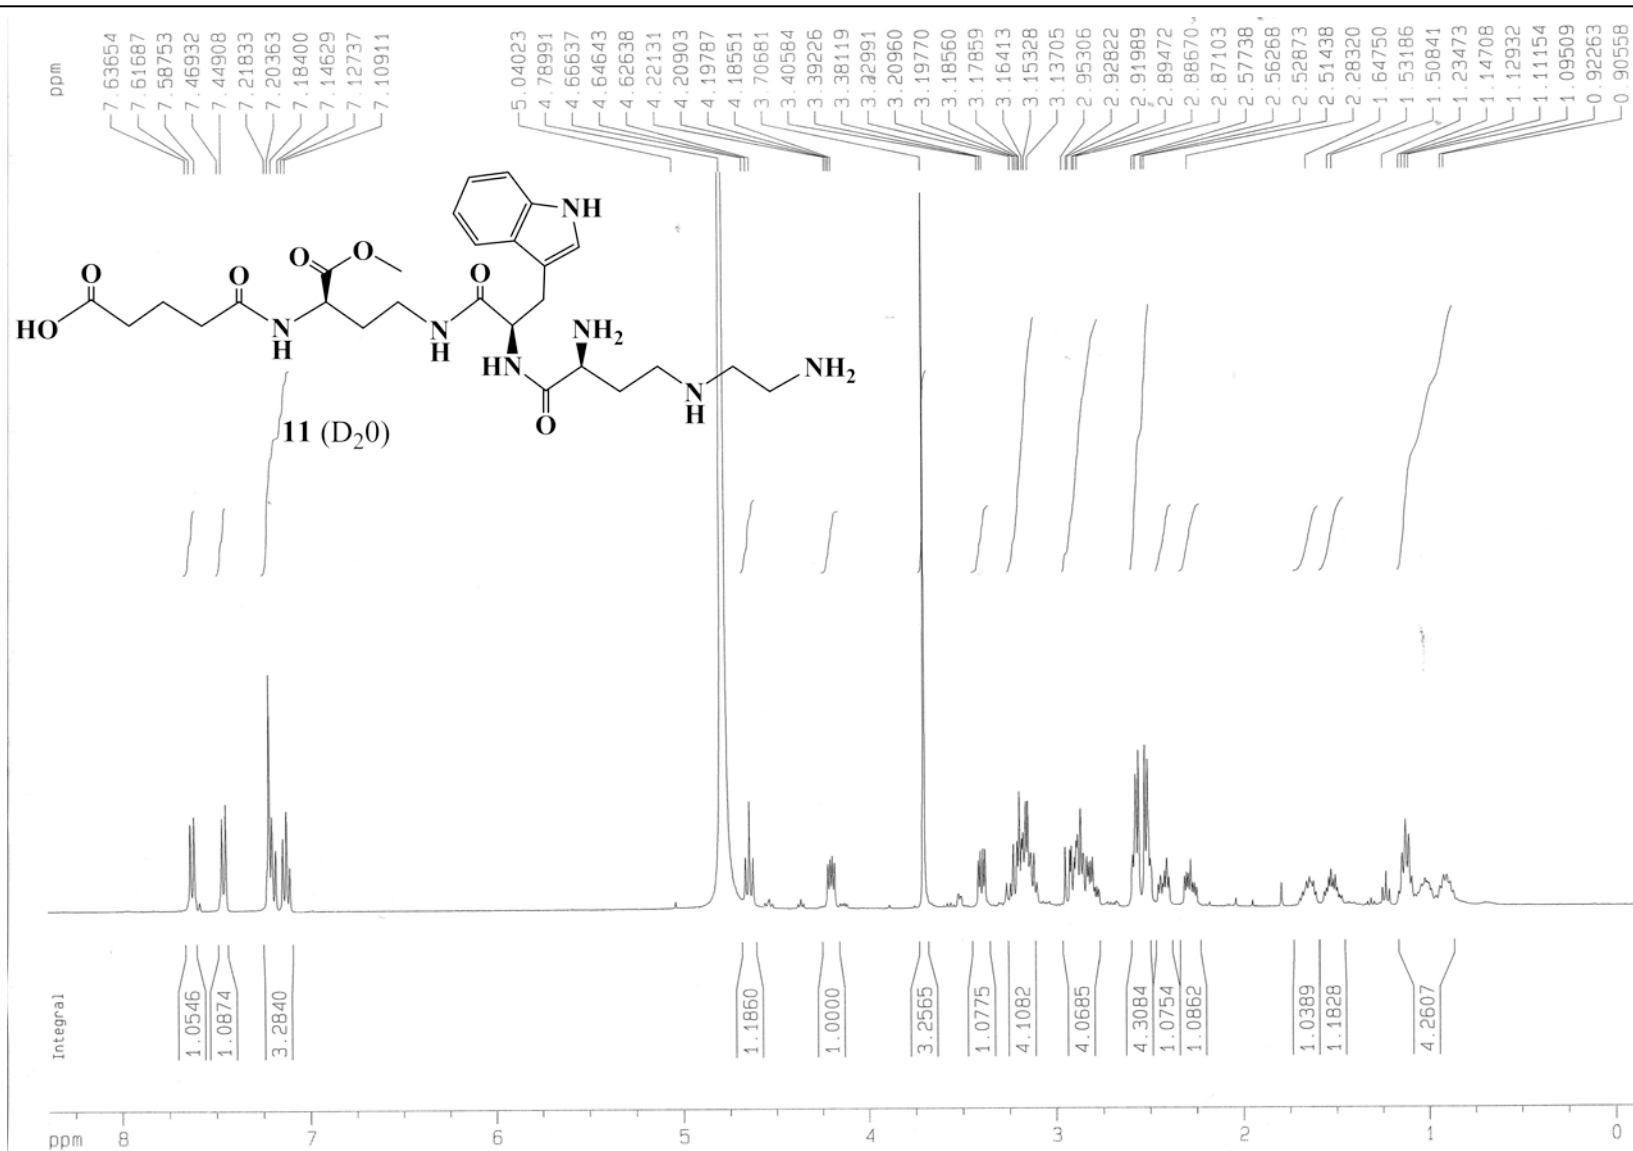

**Figure S5**

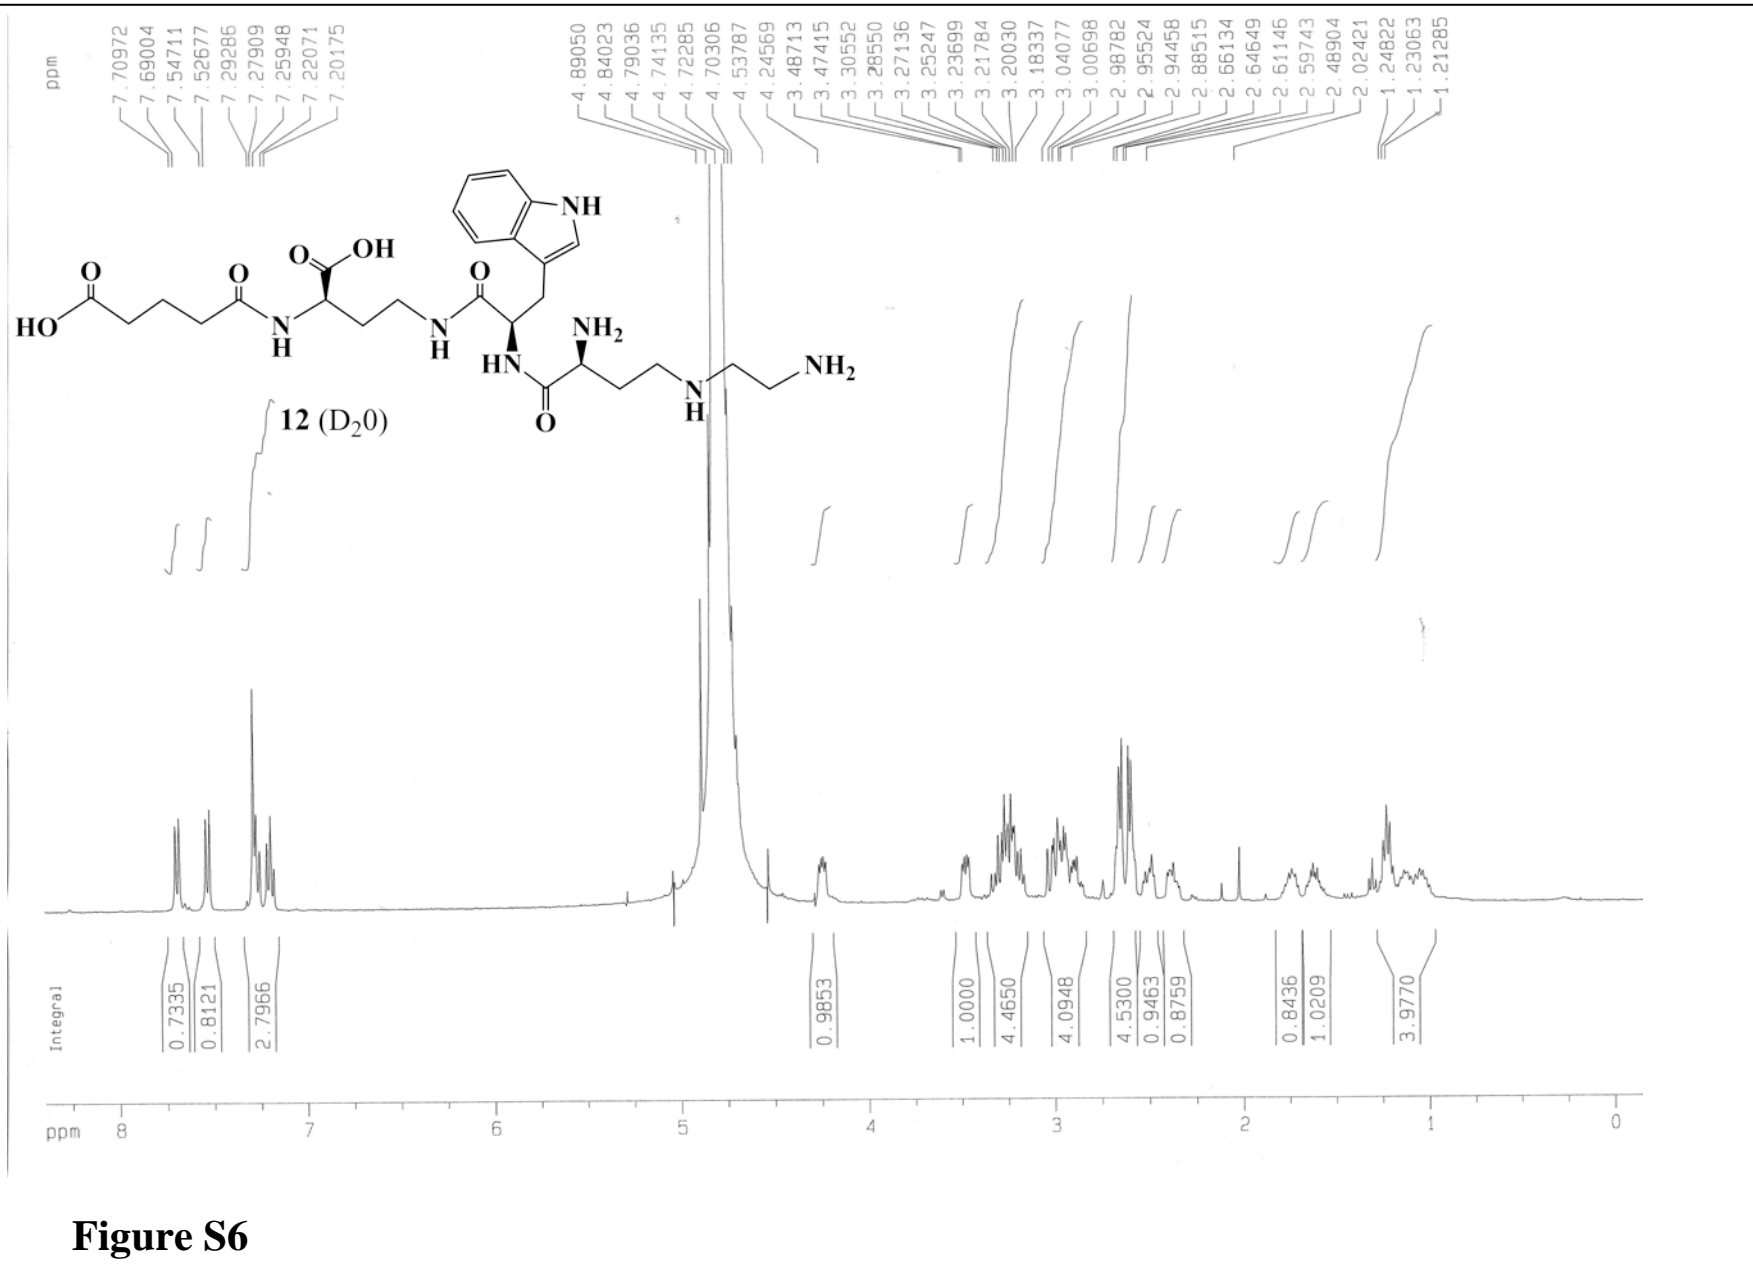

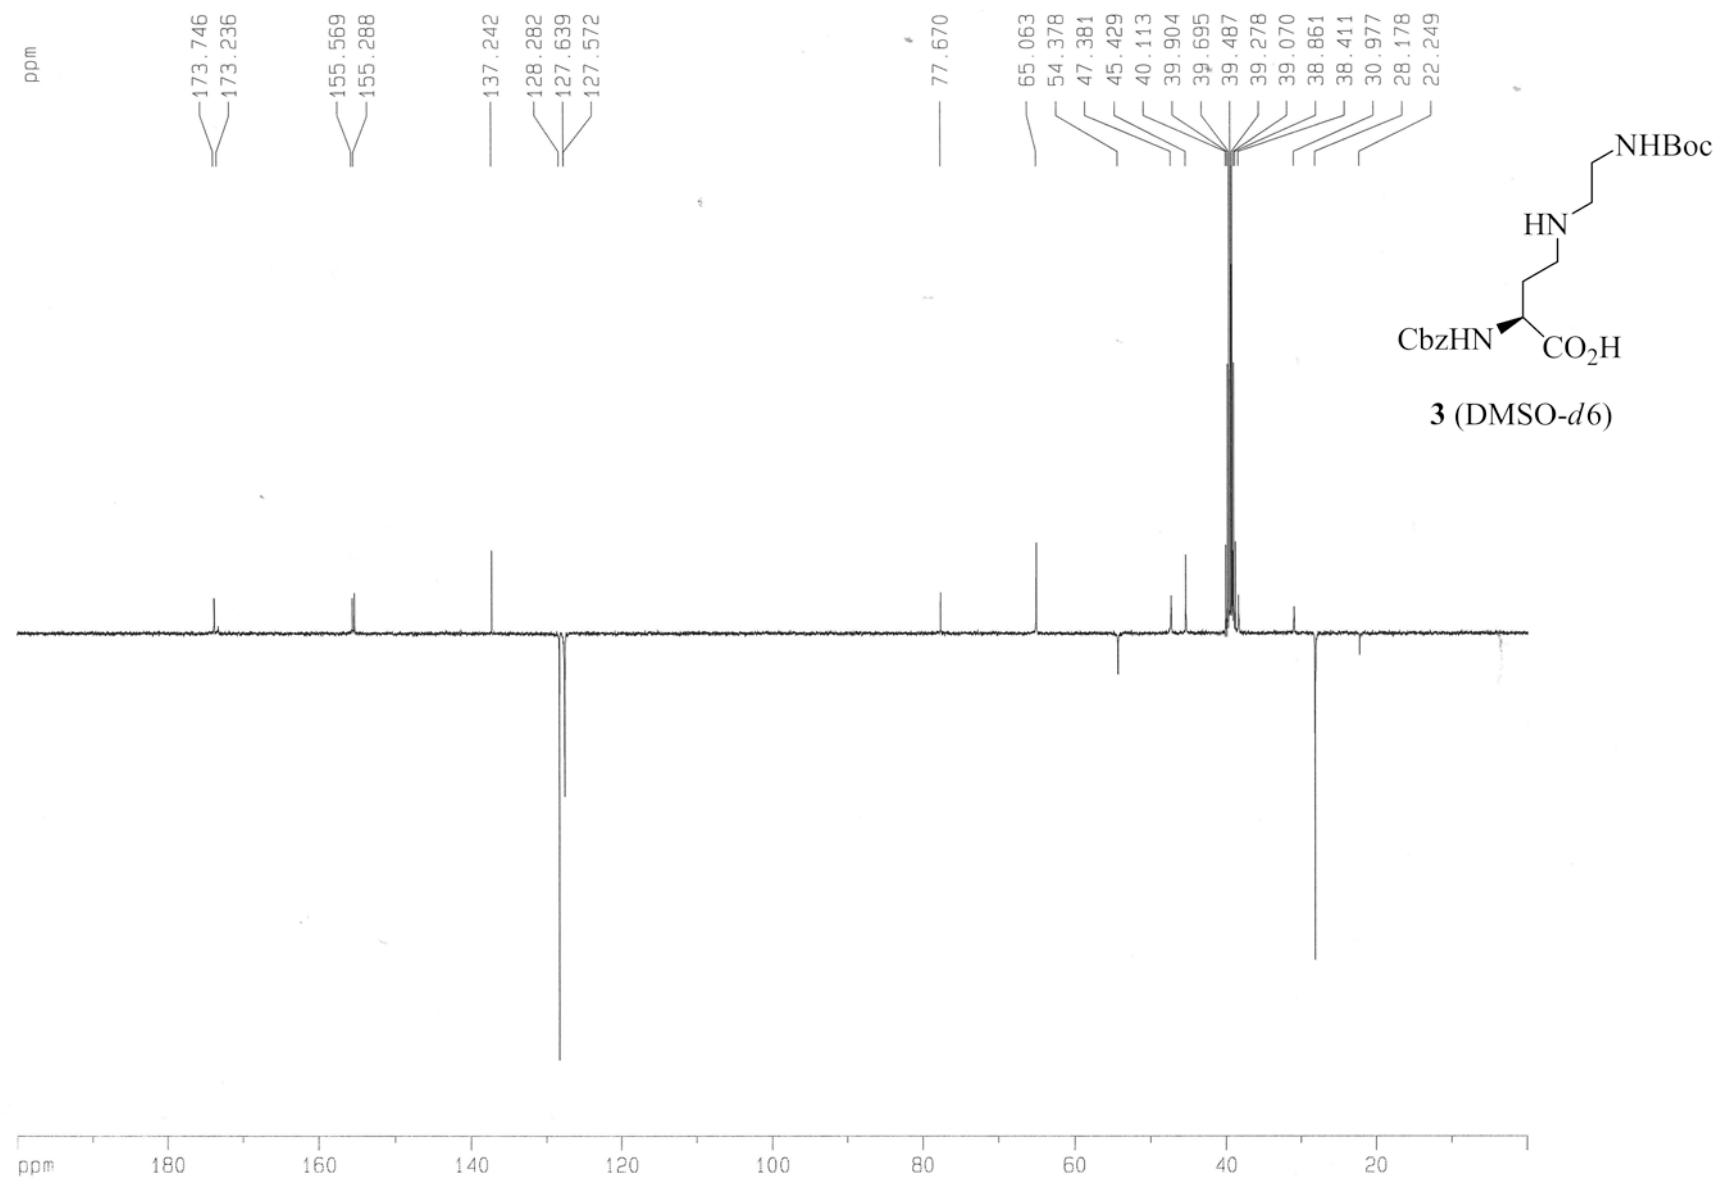

**Figure S7**

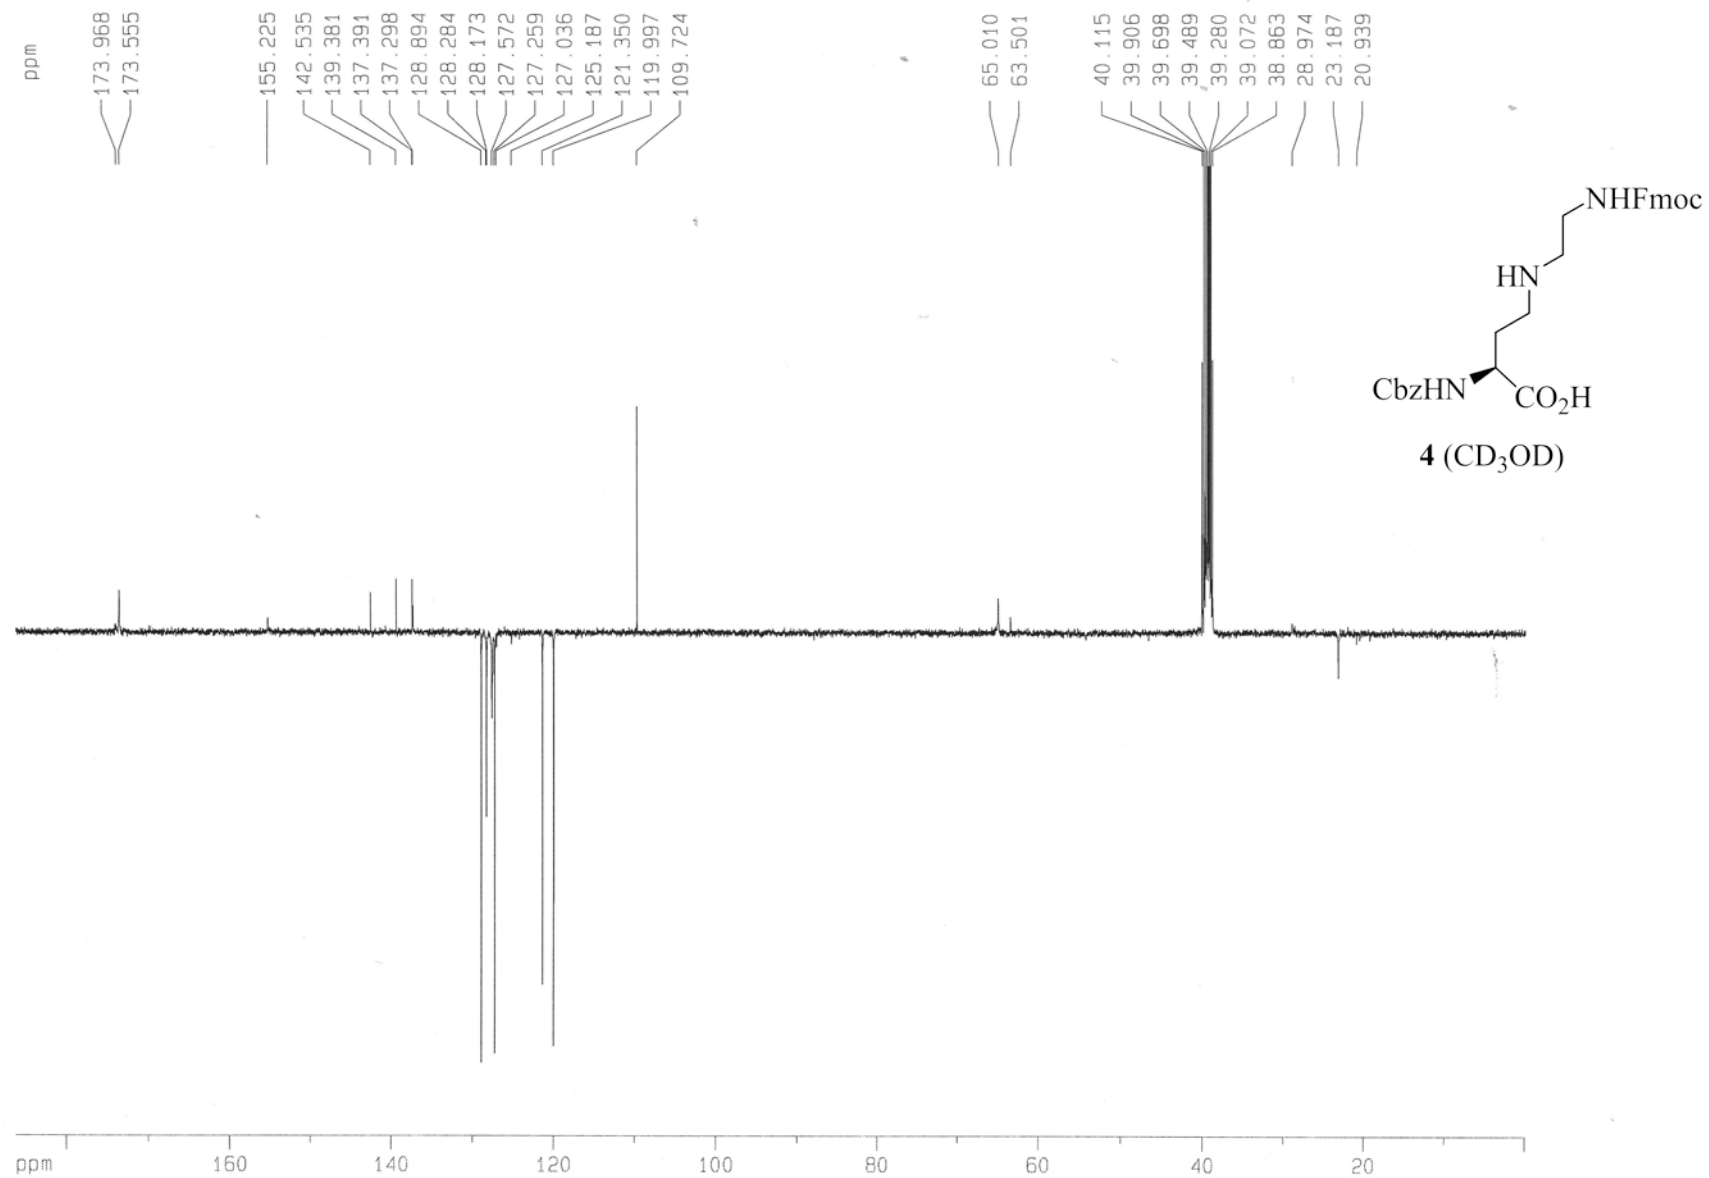

Figure S8

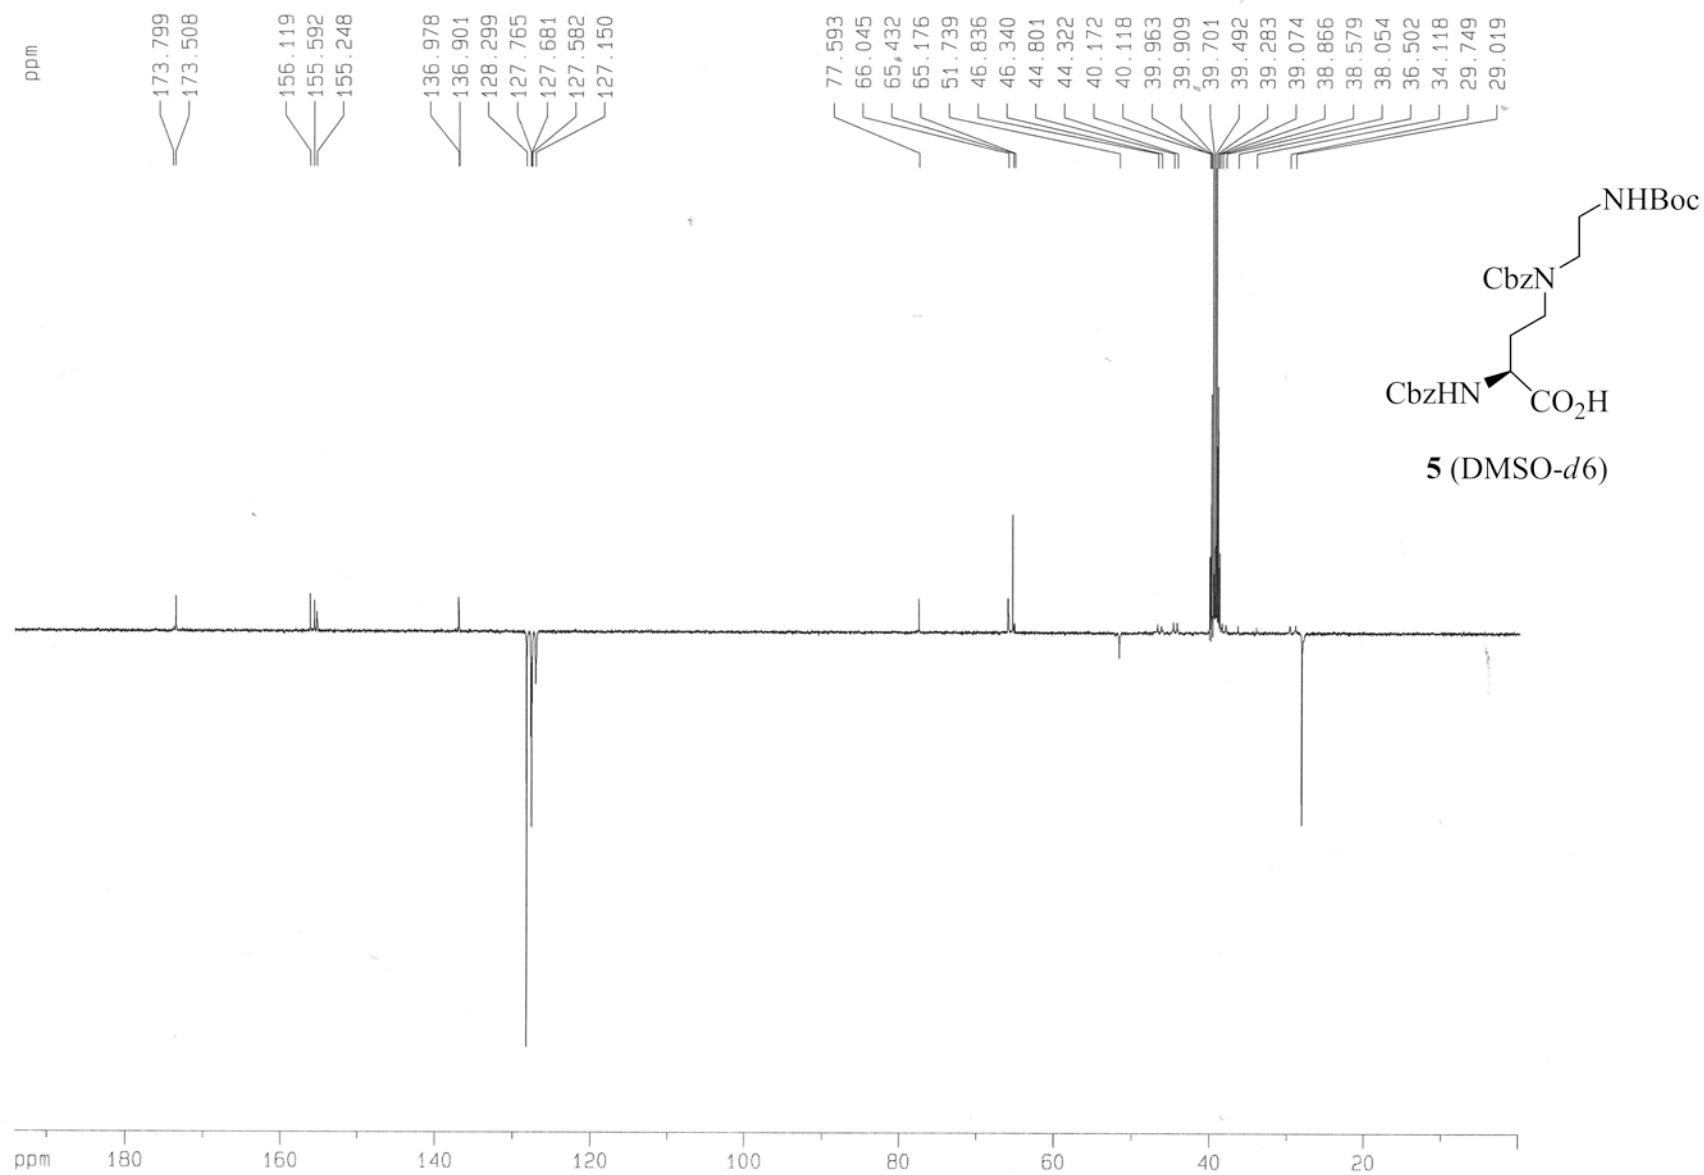

**Figure S9**

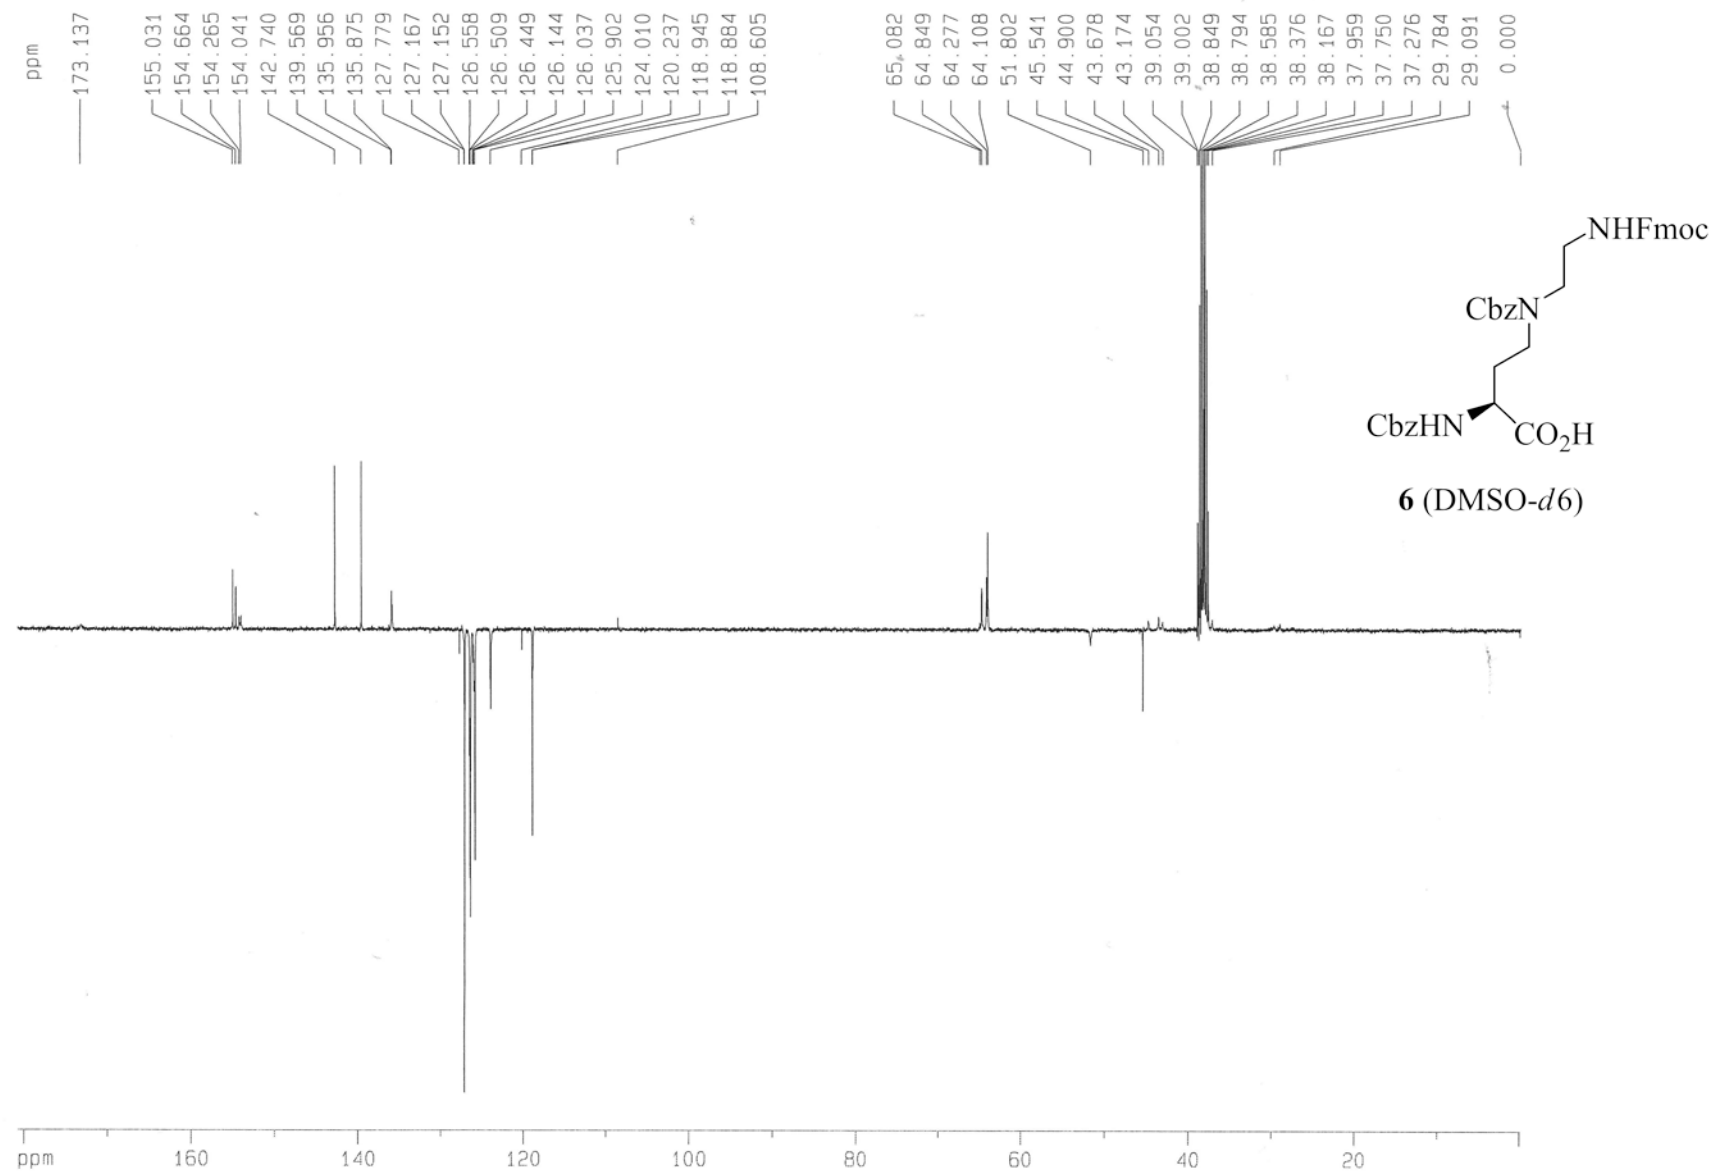

**Figure S10**

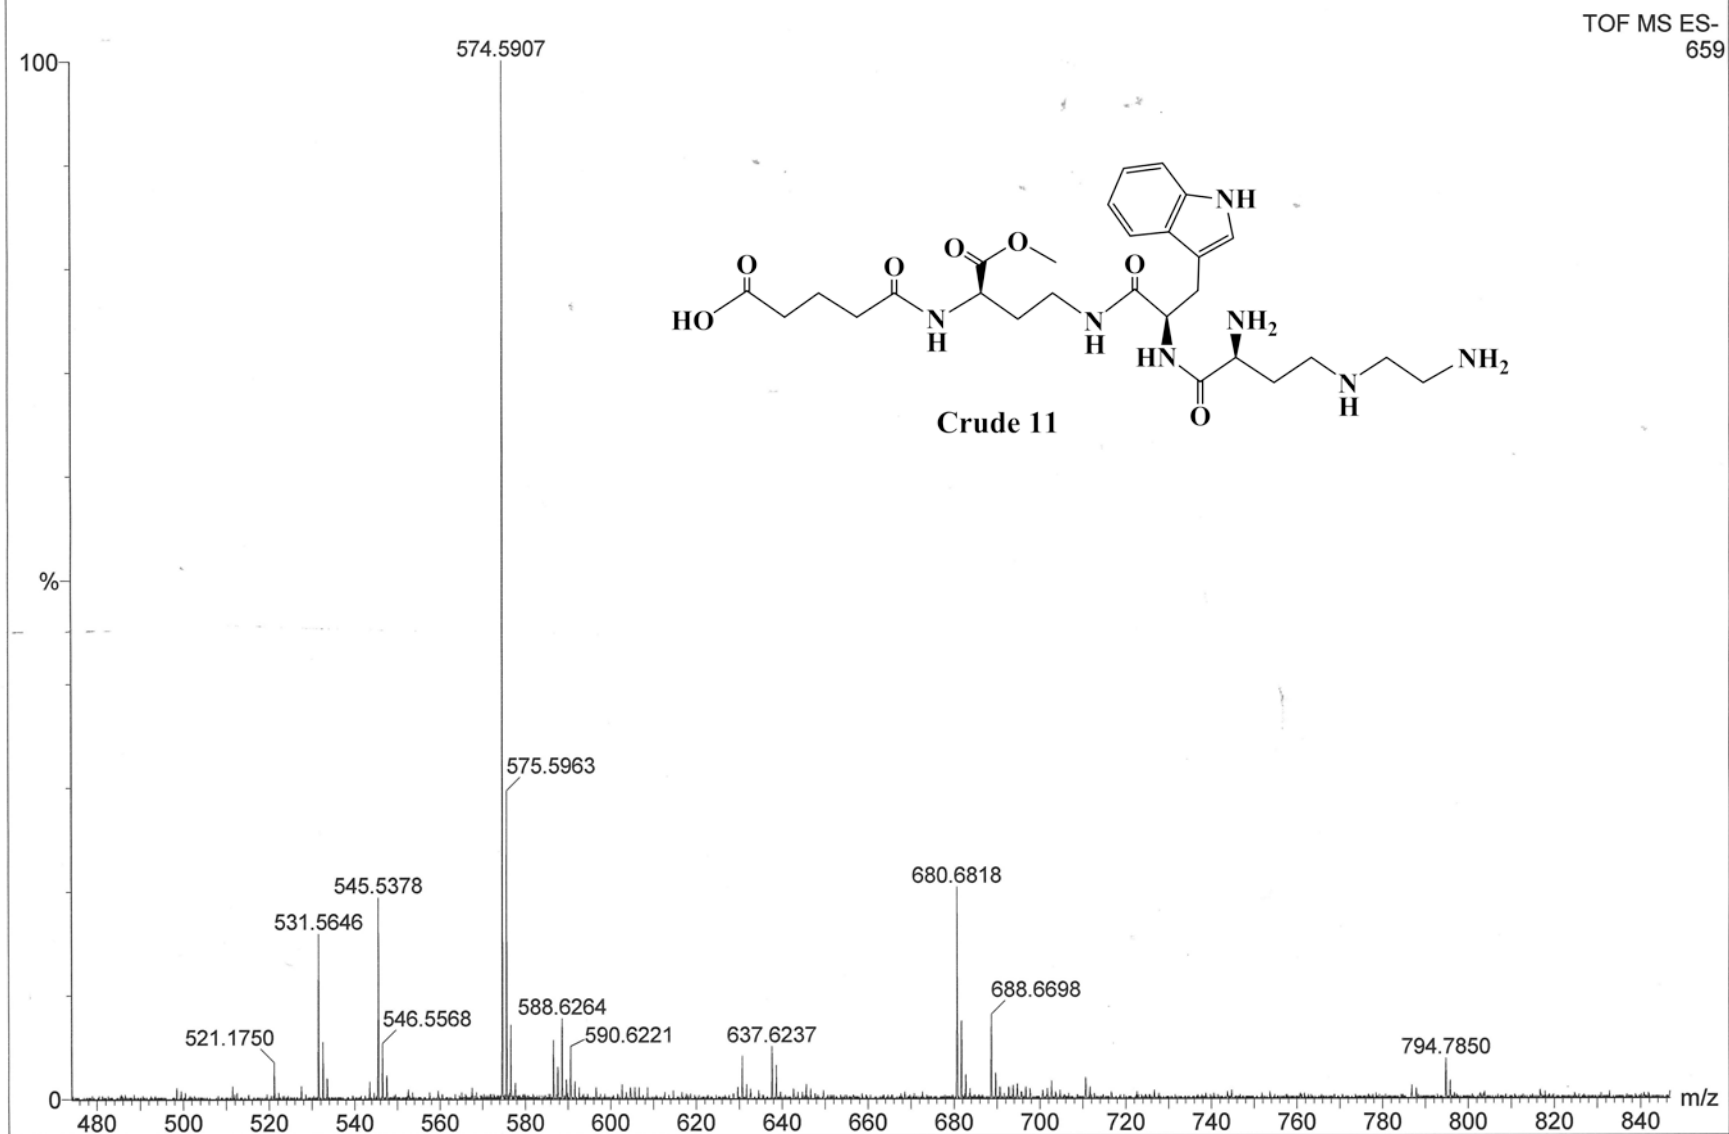

**Figure S11**

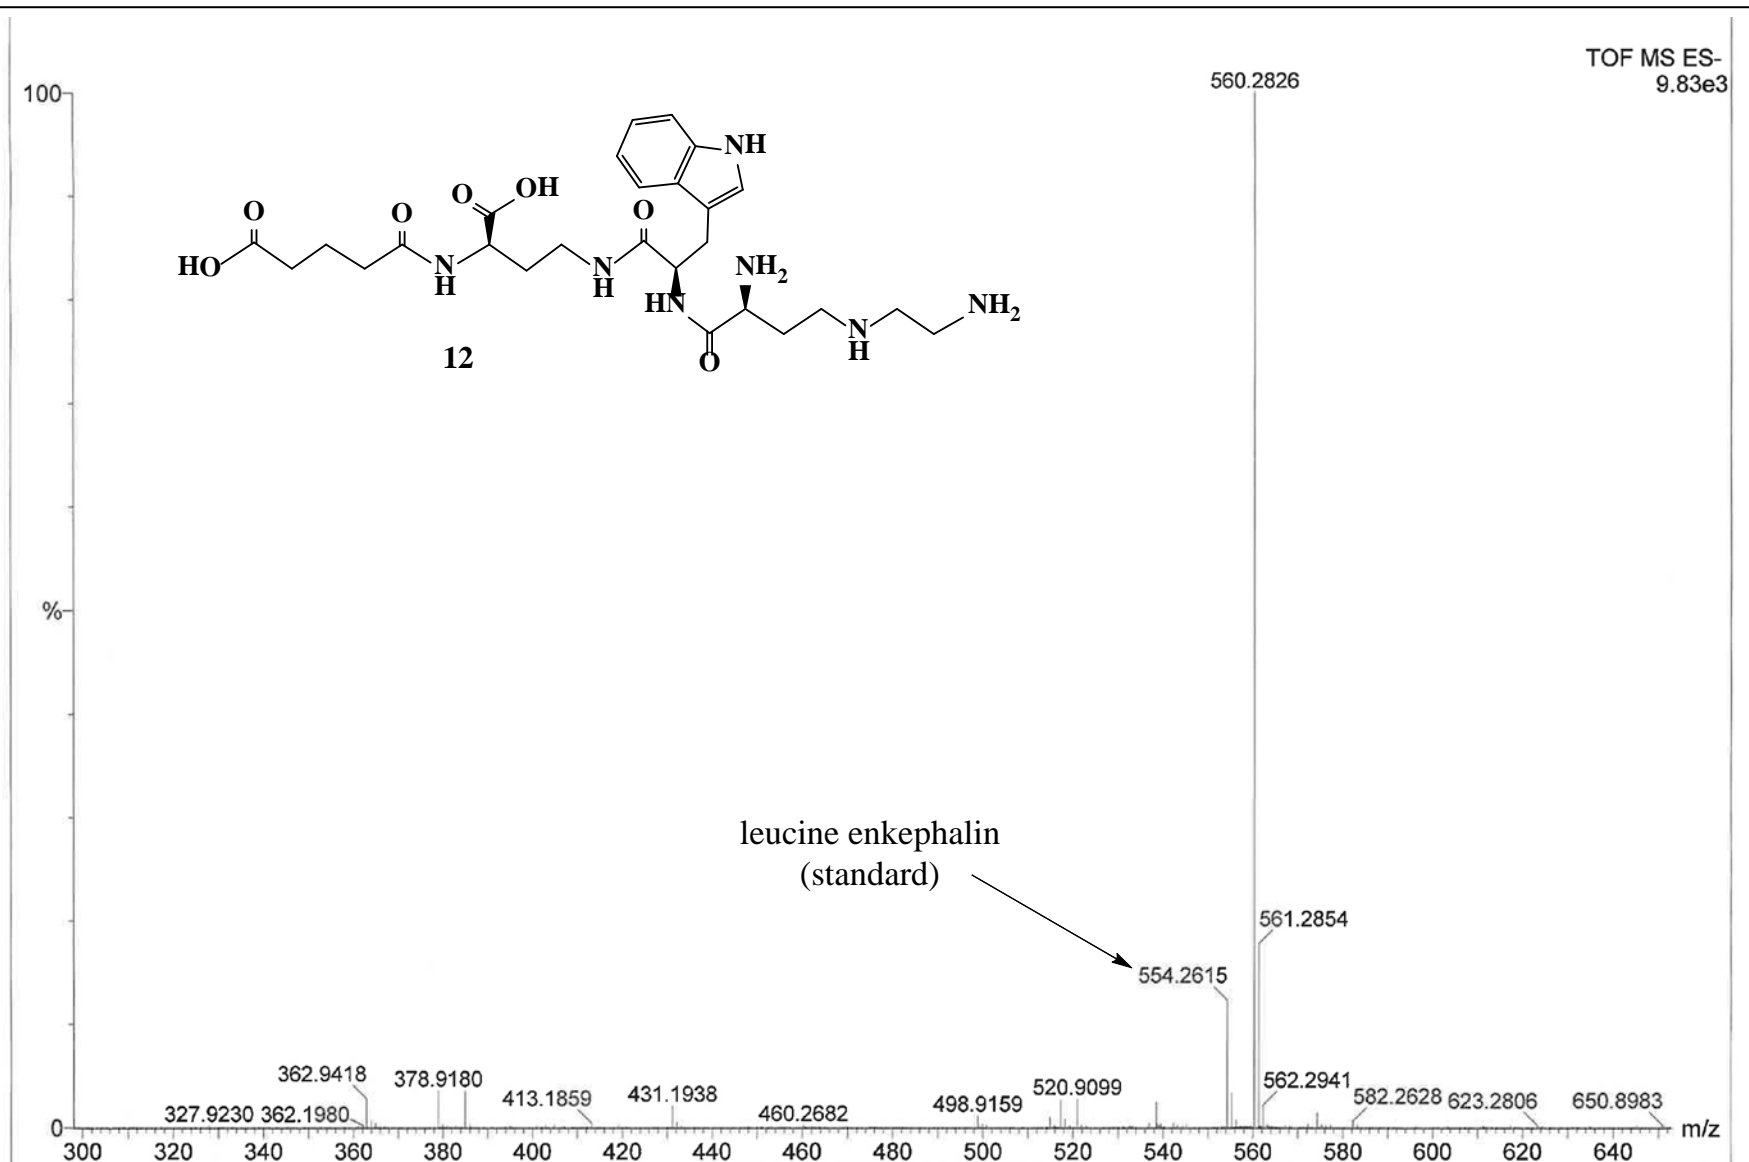

**Figure S12**

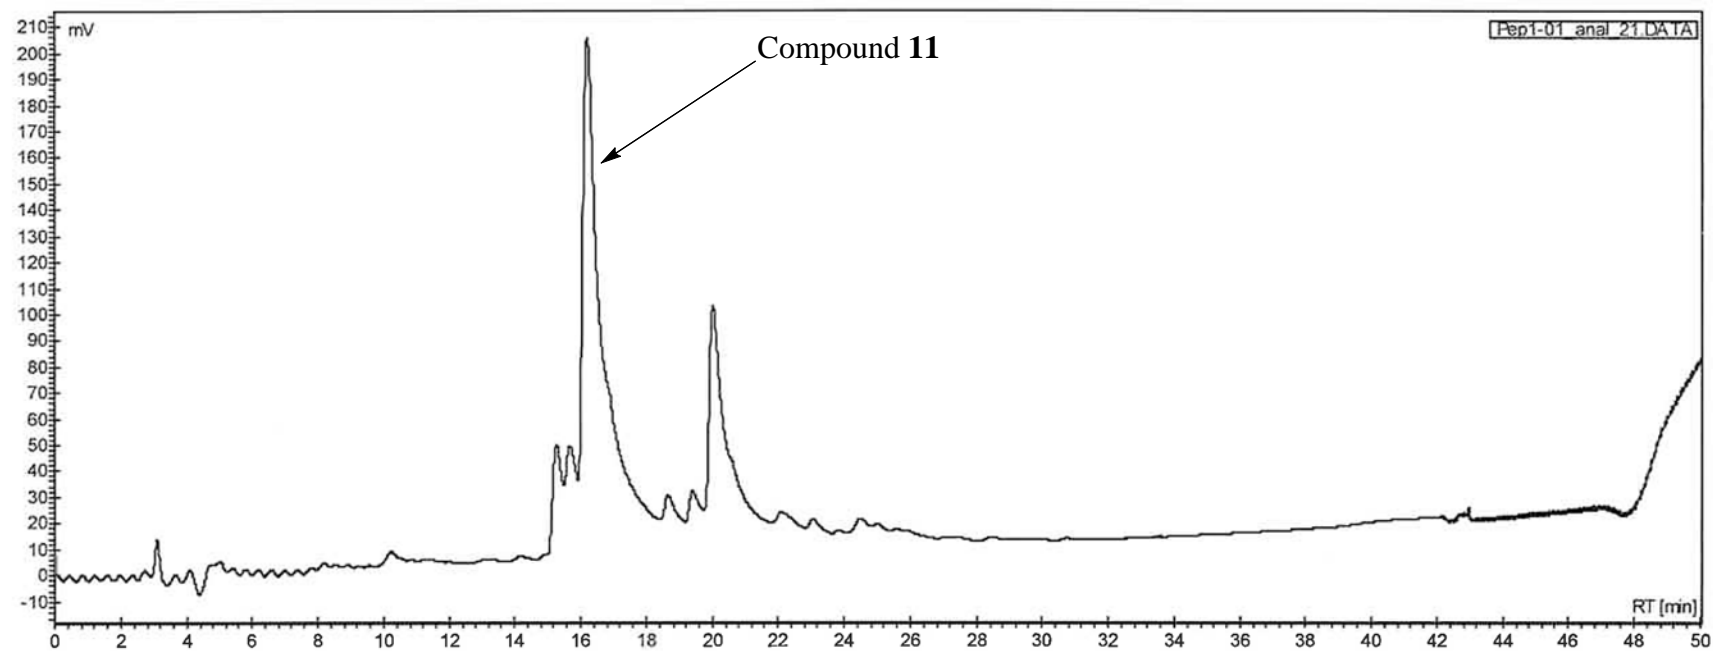

**Figure S13**

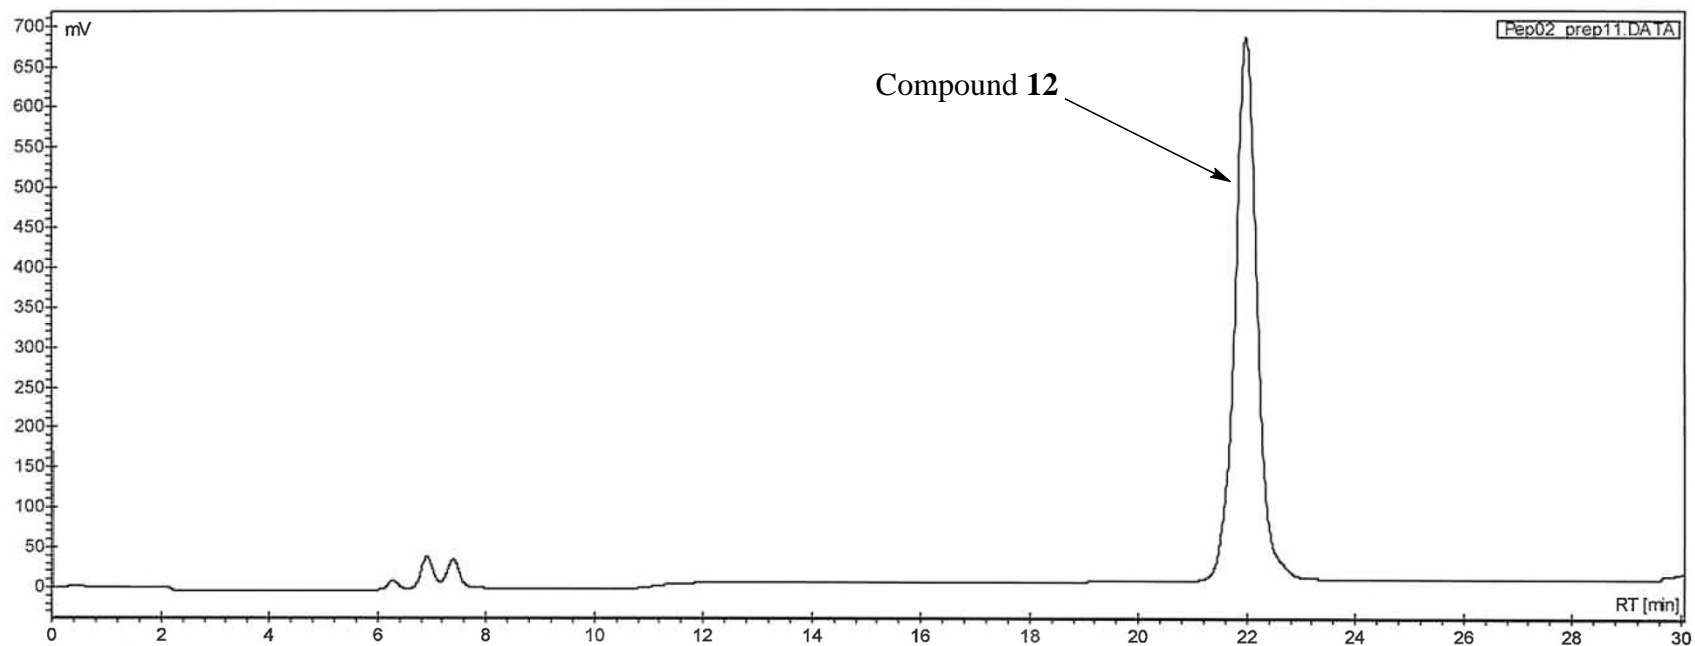

**Figure S14**

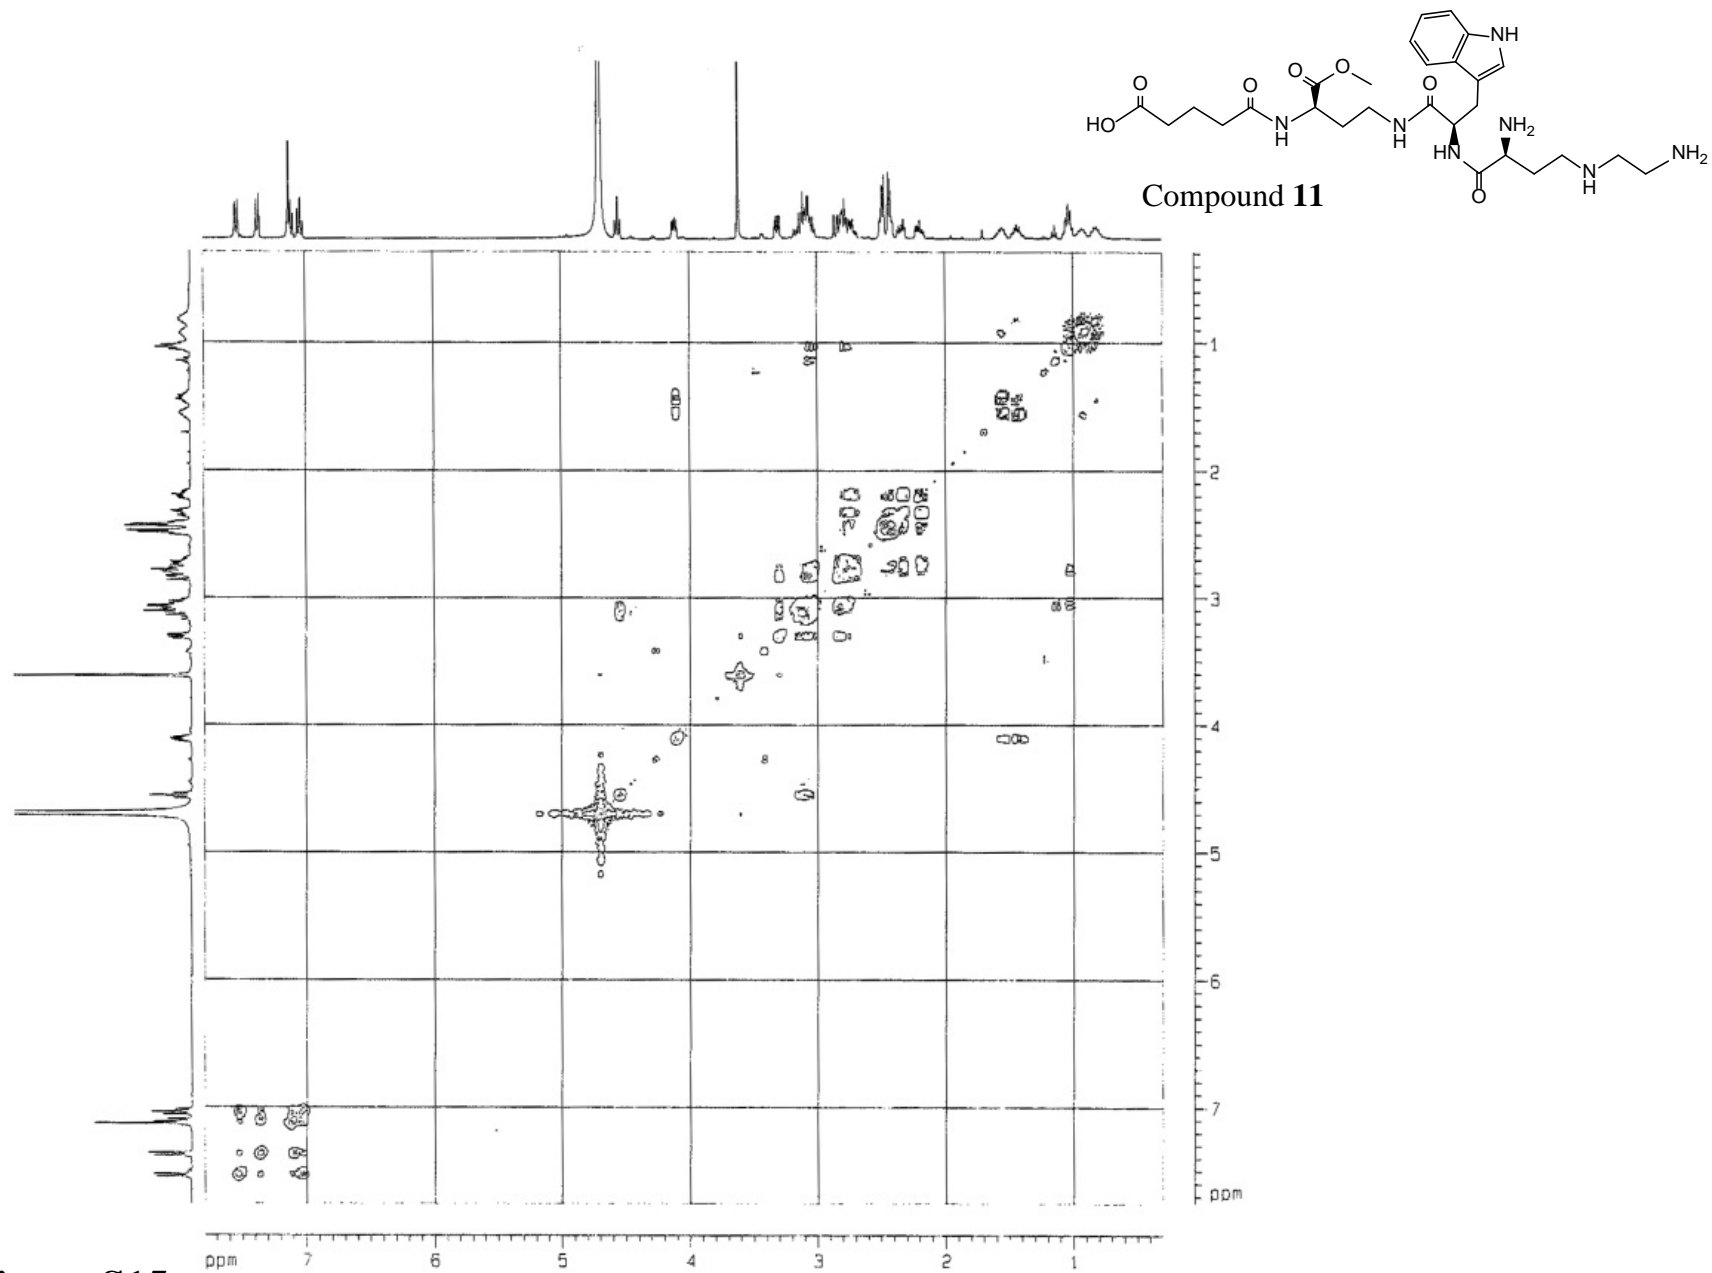

**Figure S15**

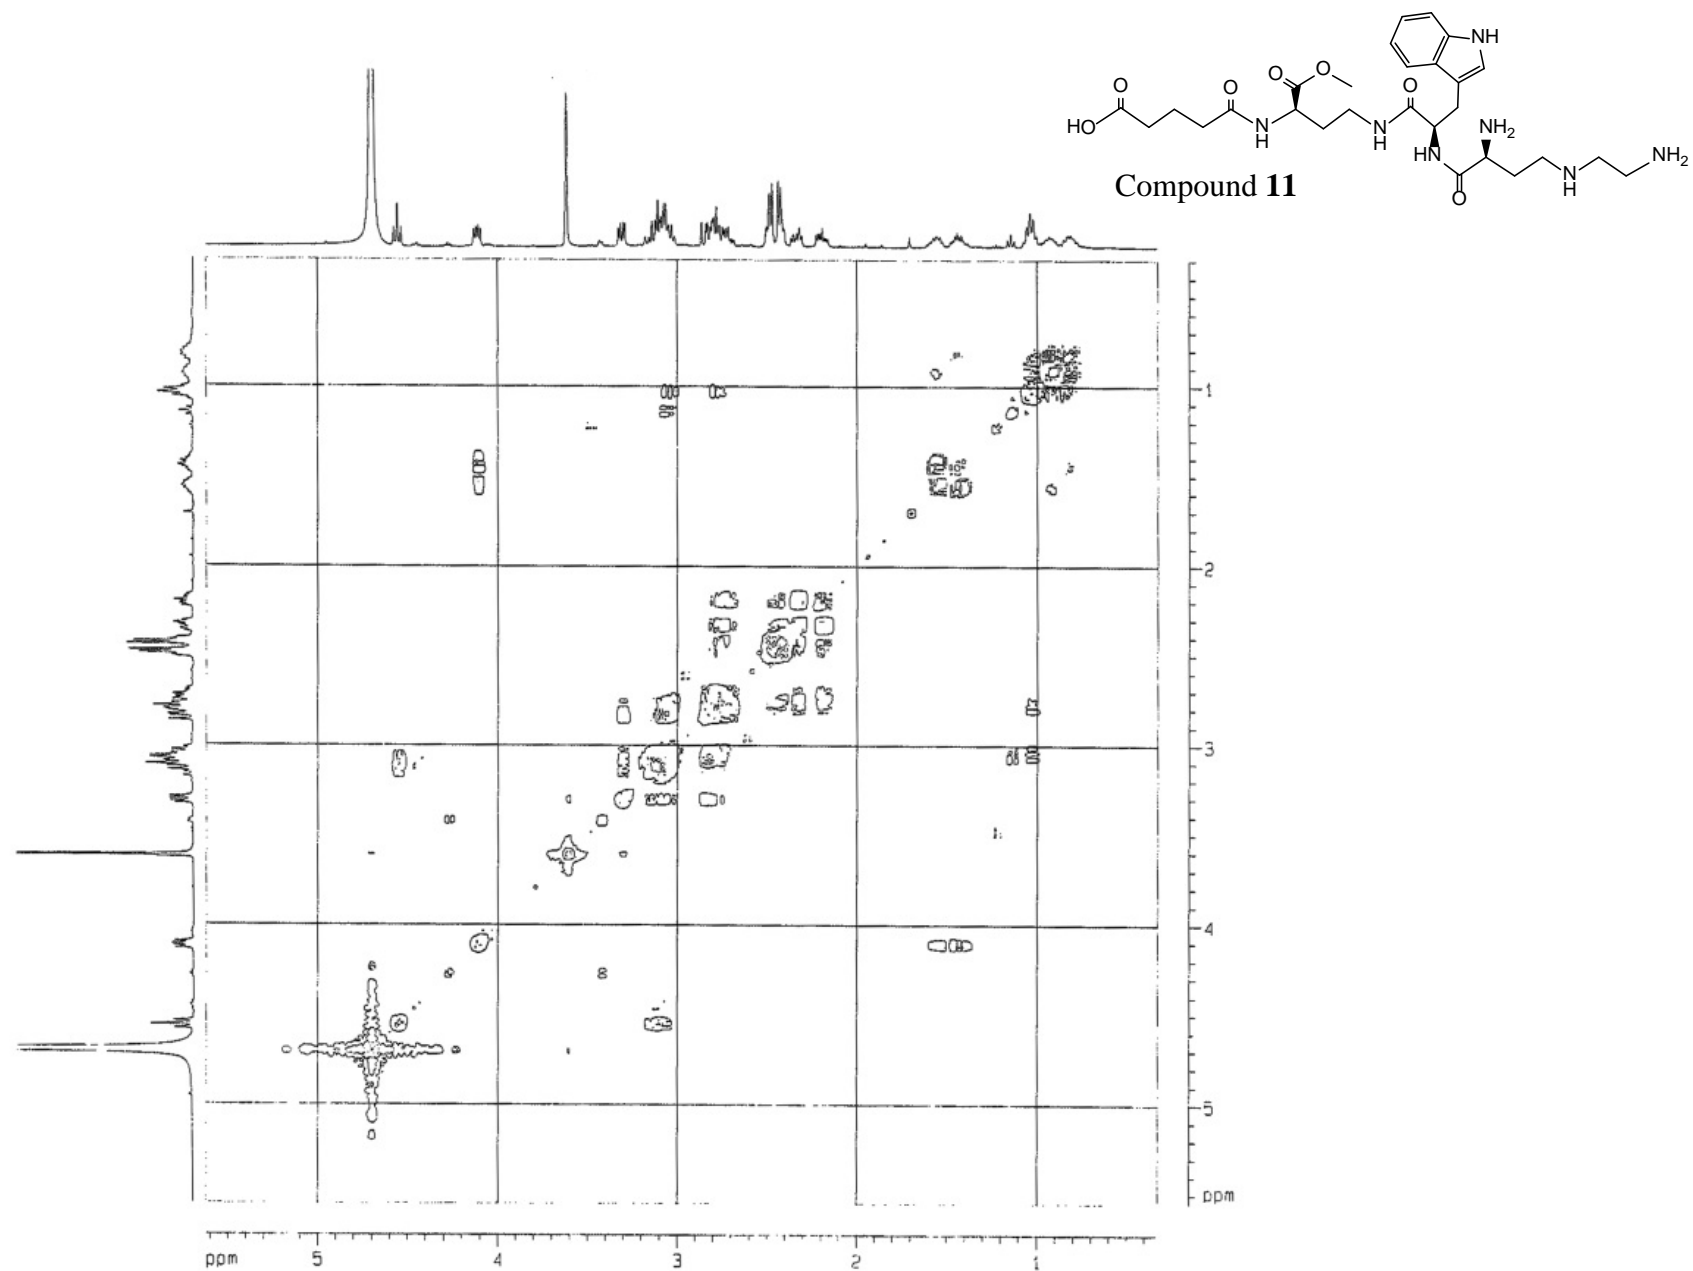

Figure S16

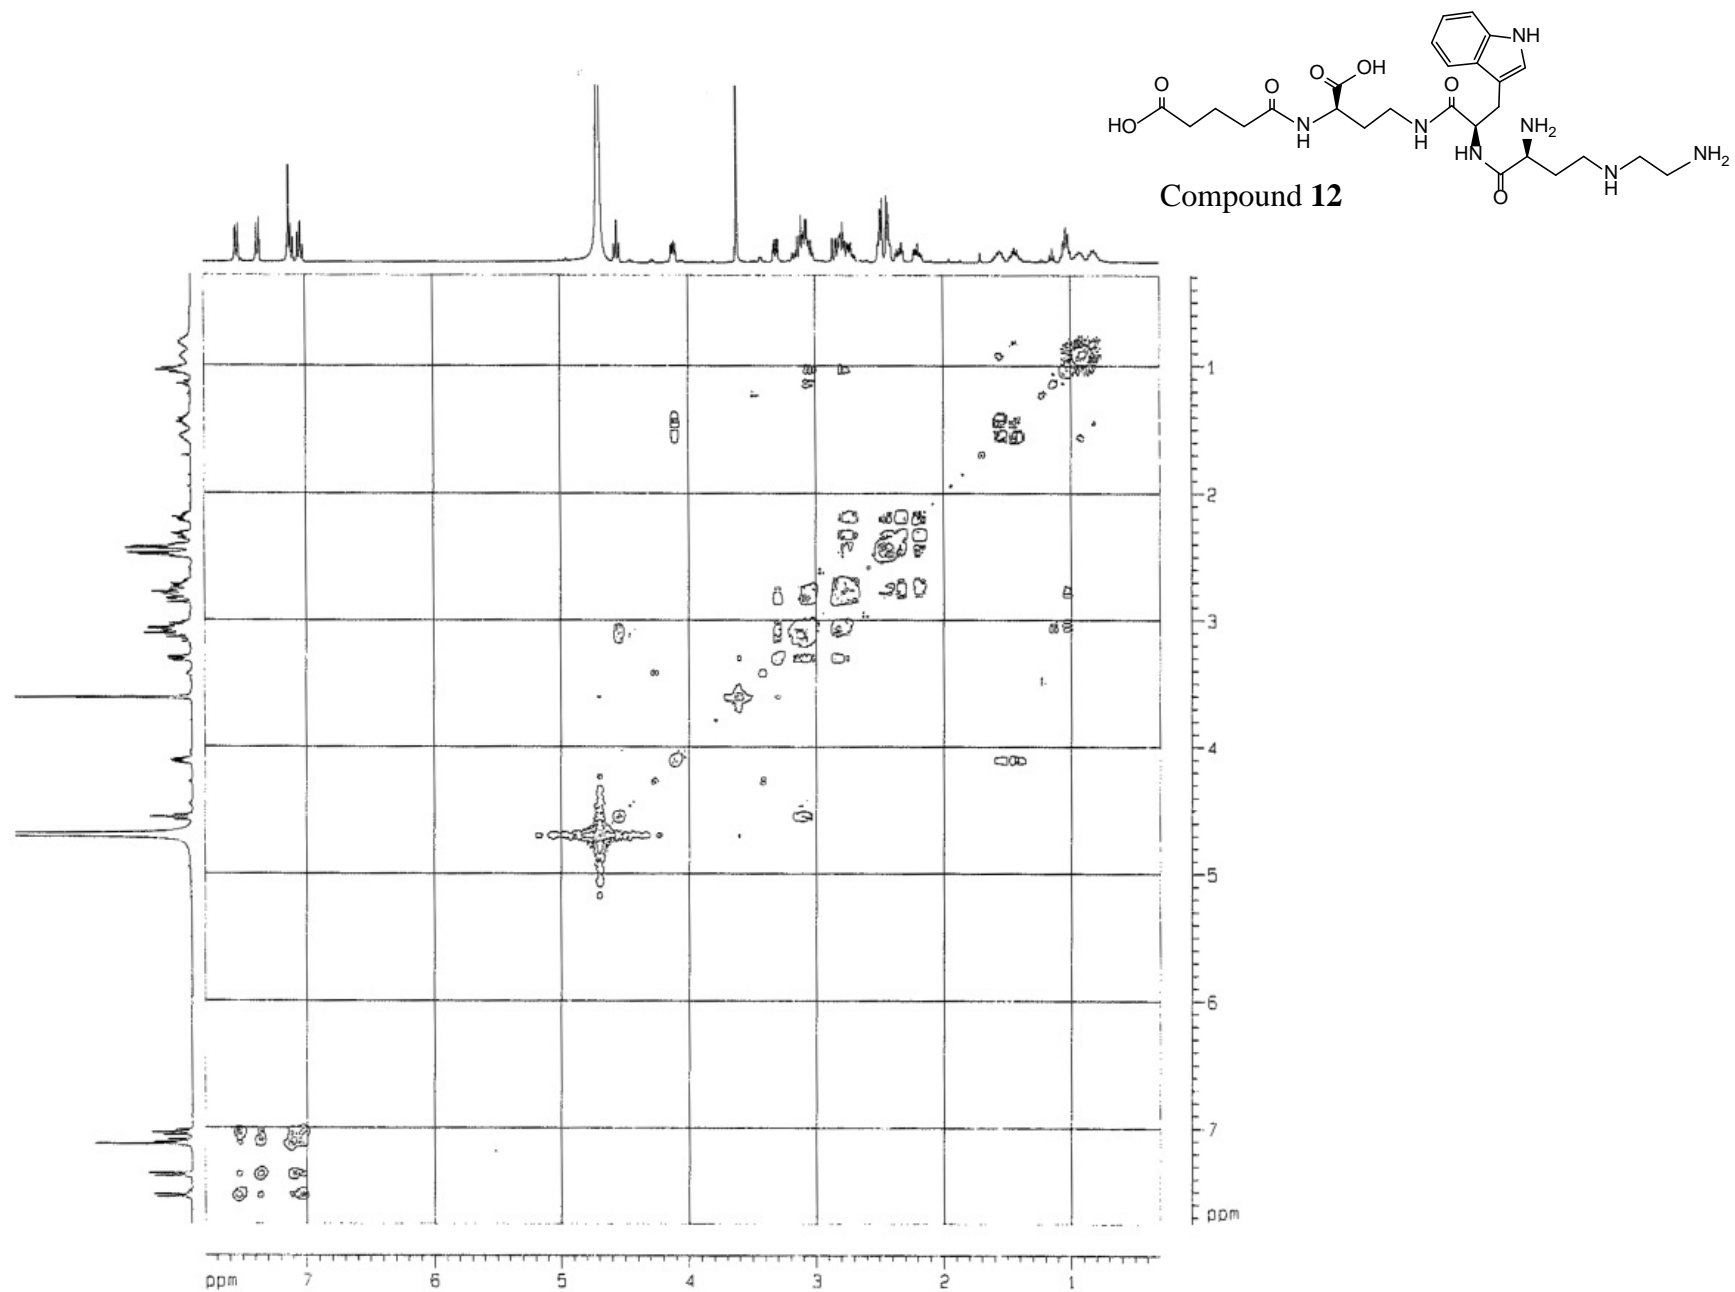

**Figure S17**

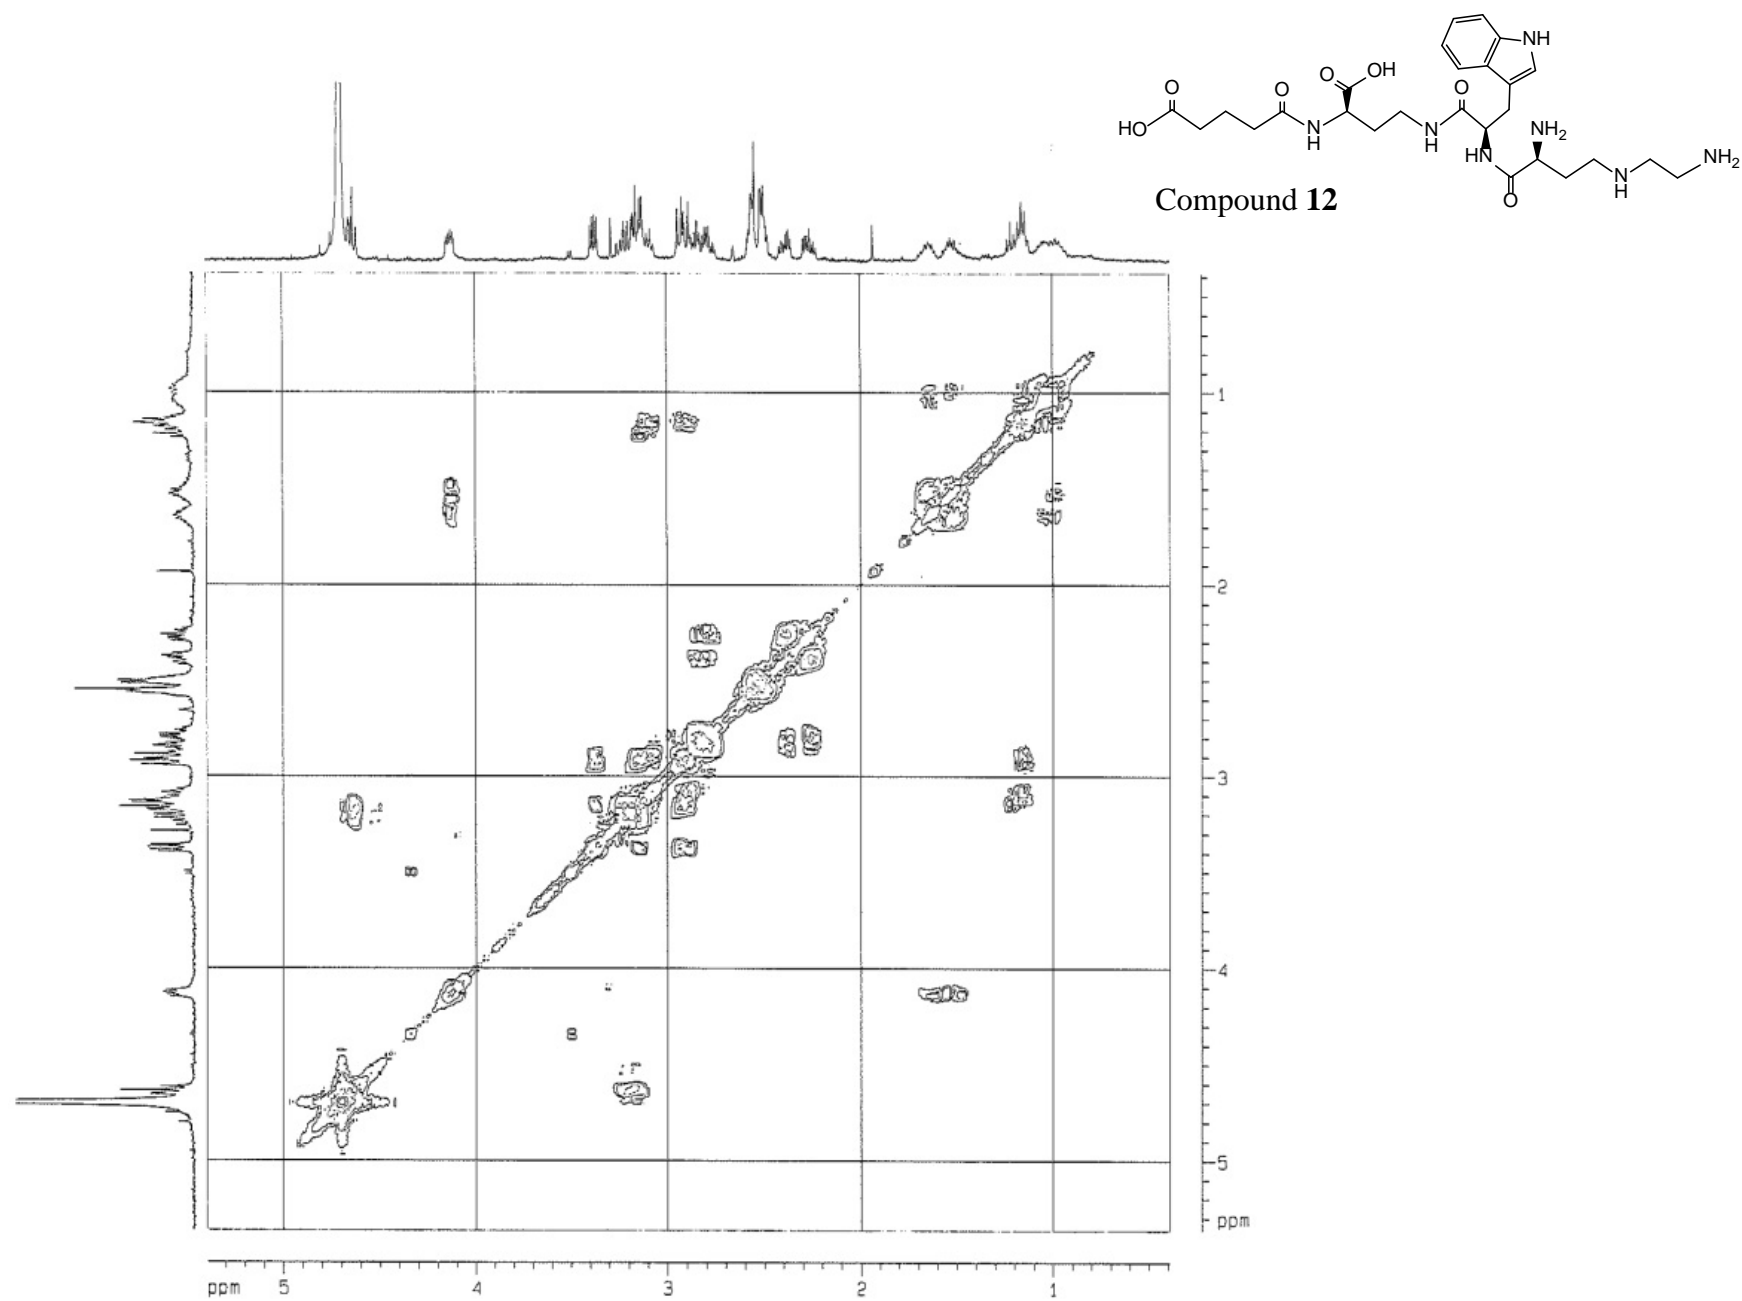

**Figure S18**
